1 **TITLE**

2 Whole Genome Sequencing of Pharmacogenetic Drug Response in Racially and  
3 Ethnically Diverse Children with Asthma

4 **AUTHORS**

5 Angel C.Y. Mak<sup>1#\*</sup>, Marquitta J. White<sup>1#</sup>, Zachary A. Szpiech<sup>2#</sup>, Walter L. Eckalbar<sup>1</sup>, Sam  
6 S. Oh<sup>1</sup>, Maria Pino-Yanes<sup>3,4</sup>, Donglei Hu<sup>1</sup>, Scott Huntsman<sup>1</sup>, Joshua Galanter<sup>1</sup>, Dara G.  
7 Torgerson<sup>1</sup>, Ann Chen Wu<sup>5,6</sup>, Blanca E. Himes<sup>7</sup>, Soren Germer<sup>8</sup>, Julia M. Vogel<sup>8</sup>, Karen  
8 L. Bunting<sup>8</sup>, Celeste Eng<sup>1</sup>, Sandra Salazar<sup>1</sup>, Kevin L. Keys<sup>1</sup>, Thomas A. Nguyen<sup>1</sup>, Pui-  
9 Yan Kwok<sup>9,10</sup>, Albert M. Levin<sup>11</sup>, Juan C. Celedón<sup>12</sup>, Erick Forno<sup>12</sup>, Hakon  
10 Hakonarson<sup>13,14</sup>, Patrick M. Sleiman<sup>13,14</sup>, Amber Dahlin<sup>5</sup>, Kelan G. Tantisira<sup>5</sup>, Scott T.  
11 Weiss<sup>5</sup>, Denise Serebrisky<sup>15</sup>, Emerita Brigino-Buenaventura<sup>16</sup>, Harold J. Farber<sup>17</sup>,  
12 Kelley Meade<sup>18</sup>, Michael A. Lenoir<sup>19</sup>, Pedro C. Avila<sup>20,+</sup>, Saunak Sen<sup>1</sup>, Shannon M.  
13 Thyne<sup>21</sup>, William Rodriguez-Cintrón<sup>22</sup>, Cheryl A. Winkler<sup>23</sup>, Andrés Moreno-  
14 Estrada<sup>24</sup>, Karla Sandoval<sup>24</sup>, Jose R. Rodriguez-Santana<sup>25</sup>, Rajesh Kumar<sup>26,27</sup>, L. Keoki  
15 Williams<sup>28,29</sup>, Nadav Ahituv<sup>1</sup>, Elad Ziv<sup>1</sup>, Max A. Seibold<sup>30</sup>, Robert B. Darnell<sup>8,31,32</sup>, Noah  
16 Zaitlen<sup>1</sup>, Ryan D. Hernandez<sup>2,10,33</sup>, Esteban G. Burchard<sup>1</sup> and the Trans-Omics for  
17 Precision Medicine Whole Genome Sequencing Program (TOPMed) Team

18 # These authors contributed equally to this work

19 + Current address: Allergy & ENT Associates. 10847 Kuykendahl Rd, Suite 100. The  
20 Woodlands, TX 77382.

21 \* Correspondence and material requests should be addressed to Angel C.Y. Mak  
22 (angel.mak@ucsf.edu)

### 23 **AUTHOR AFFILIATIONS**

24 <sup>1</sup> Department of Medicine, University of California San Francisco, San Francisco,  
25 California, USA.

26 <sup>2</sup> Department of Bioengineering and Therapeutic Sciences, University of California  
27 San Francisco, San Francisco, California, USA.

28 <sup>3</sup> Research Unit, Hospital Universitario N.S. de Candelaria, Universidad de La Laguna,  
29 Santa Cruz de Tenerife, Spain.

30 <sup>4</sup> CIBER de Enfermedades Respiratorias, Instituto de Salud Carlos III, Madrid, Spain.

31 <sup>5</sup> Channing Division of Network Medicine, Department of Medicine, Brigham and  
32 Women's Hospital and Harvard Medical School, Boston, Massachusetts, USA.

33 <sup>6</sup> Precision Medicine Translational Research (PRoMoTeR) Center, Department of  
34 Population Medicine, Harvard Medical School and Pilgrim Health Care Institute,  
35 Boston, Massachusetts, USA.

36 <sup>7</sup> Department of Biostatistics, Epidemiology and Informatics, University of  
37 Pennsylvania, Philadelphia, Pennsylvania, USA.

38 <sup>8</sup> New York Genome Center, New York, New York, USA.

39 <sup>9</sup> Cardiovascular Research Institute, University of California San Francisco, San  
40 Francisco, California, USA.

- 41 <sup>10</sup> Institute for Human Genetics, University of California San Francisco, San  
42 Francisco, California, USA.
- 43 <sup>11</sup> Department of Public Health Sciences, Henry Ford Health System, Detroit  
44 Michigan, USA.
- 45 <sup>12</sup> Division of Pediatric Pulmonary Medicine, Allergy and Immunology, University of  
46 Pittsburgh School of Medicine, Pittsburgh, Pennsylvania, USA.
- 47 <sup>13</sup> Center for Applied Genomics, The Children’s Hospital of Philadelphia Research  
48 Institute, Philadelphia, Pennsylvania, USA.
- 49 <sup>14</sup> Department of Pediatrics, Perelman School of Medicine, University of  
50 Pennsylvania, Philadelphia, Pennsylvania, USA.
- 51 <sup>15</sup> Pediatric Pulmonary Division, Jacobi Medical Center, Bronx, New York, USA.
- 52 <sup>16</sup> Department of Allergy and Immunology, Kaiser Permanente Vallejo Medical  
53 Center, Vallejo, California, USA.
- 54 <sup>17</sup> Department of Pediatrics, Baylor College of Medicine and Texas Children’s  
55 Hospital, Houston, Texas, USA.
- 56 <sup>18</sup> Children’s Hospital and Research Center, Oakland, California, USA.
- 57 <sup>19</sup> Bay Area Pediatrics, Oakland, California, USA.
- 58 <sup>20</sup> Department of Medicine, Northwestern University, Chicago, Illinois, USA.
- 59 <sup>21</sup> Department of Pediatrics, David Geffen School of Medicine, University of  
60 California, Los Angeles, Los Angeles, California, USA.
- 61 <sup>22</sup> Veterans Caribbean Health Care System, San Juan, Puerto Rico.

62 <sup>23</sup> Basic Science Laboratory, Center for Cancer Research, National Cancer Institute,  
63 Leidos Biomedical Research, Frederick National Laboratory, Frederick, Maryland,  
64 USA.

65 <sup>24</sup> National Laboratory of Genomics for Biodiversity (UGA-LANGEBIO), CINVESTAV,  
66 Irapuato, Guanajuato, Mexico.

67 <sup>25</sup> Centro de Neumologia Pediatrica, San Juan, Puerto Rico.

68 <sup>26</sup> Feinberg School of Medicine's Division of Allergy and Immunology, Northwestern  
69 University, Chicago, Illinois, USA.

70 <sup>27</sup> Ann & Robert H. Lurie Children's Hospital of Chicago, Chicago, Illinois, USA.

71 <sup>28</sup> Department of Internal Medicine, Henry Ford Health System, Detroit, Michigan,  
72 USA.

73 <sup>29</sup> Center for Health Policy and Health Services Research, Henry Ford Health System,  
74 Detroit, Michigan, USA.

75 <sup>30</sup> Center for Genes, Environment and Health, Department of Pediatrics, National  
76 Jewish Health, Denver, Colorado, USA.

77 <sup>31</sup> Laboratory of Molecular Neuro-Oncology, The Rockefeller University, New York,  
78 New York, USA.

79 <sup>32</sup> Howard Hughes Medical Institute, The Rockefeller University, New York, New York,  
80 USA.

81 <sup>33</sup> Quantitative Biosciences Institute, University of California San Francisco, San  
82 Francisco, California, USA.

83 **ACKNOWLEDGEMENTS**

84 Whole genome sequencing (WGS) for the Trans-Omics in Precision Medicine  
85 (TOPMed) program was supported by the National Heart, Lung, and Blood Institute  
86 (NHLBI). WGS for "NHLBI TOPMed: Genes-environments & Admixture in Latino  
87 Americans (GALA II) Study" (phs000920) and "NHLBI TOPMed: Study of African  
88 Americans, Asthma, Genes and Environments (SAGE)" (phs000921) was performed  
89 at the New York Genome Center (3R01HL117004-01S3). We acknowledge New York  
90 Genome Center investigators and teams for whole genome sequencing sample  
91 preparation, quality control, data generation, data processing and initial joint  
92 genotyping. Centralized read mapping and genotype calling, along with variant  
93 quality metrics and filtering were provided by the TOPMed Informatics Research  
94 Center (3R01HL-117626-02S1). Phenotype harmonization, data management,  
95 sample-identity QC, and general study coordination were provided by the TOPMed  
96 Data Coordinating Center (3R01HL-120393-02S1). We gratefully acknowledge the  
97 studies and participants who provided biological samples and data for TOPMed. This  
98 work was supported in part by the Sandler Family Foundation, the American Asthma  
99 Foundation, the RWJF Amos Medical Faculty Development Program, Harry Wm. and  
100 Diana V. Hind Distinguished Professor in Pharmaceutical Sciences II, National Heart,  
101 Lung, and Blood Institute R01HL117004, R01HL128439, R01HL135156,  
102 X01HL134589, National Institute of Environmental Health Sciences R01ES015794,  
103 R21ES24844, the National Institute on Minority Health and Health Disparities  
104 P60MD006902, U54MD009523, R01MD010443, and the Tobacco-Related Disease

105 Research Program under Award Number 24RT-0025. M.P.-Y. was supported by the  
106 grant AC15/00015 by Instituto de Salud Carlos III within the ERA-CoSysMed 1<sup>st</sup> Joint  
107 Transnational Call (SysPharmPedia) from the European Union, under the Horizon  
108 2020. R.B.D., S.G., K.L.B. and J.M.V. were supported by the National Human Genome  
109 Research Institute of the National Institutes of Health under Award Number  
110 UM1HG008901. C.A.W. was funded in part with federal funds from the National  
111 Cancer Institute, National Institutes of Health, under contract HHSN26120080001E,  
112 and by the Intramural Research Program of the NIH, National Cancer Institute, Center  
113 for Cancer Research. The content of this publication does not necessarily reflect the  
114 views or policies of the Department of Health and Human Services, nor does mention  
115 of trade names, commercial products, or organizations imply endorsement by the U.S.  
116 Government.

117 **AUTHOR CONTRIBUTIONS**

118 A.C.Y.M., M.J.W., Z.A.S., D.H., M.P.-Y., J.G. and S.H. analyzed data. R.D.H., N.Z., M.A.S.,  
119 E.G.B., D.G.T., M.J.W., A.C.Y.M., N.A., E.Z., R.B.D. and P.-Y.K. designed experiments or  
120 supervised research. A.C.Y.M., M.J.W., Z.A.S., S.S.O., M.P.-Y., E.G.B. and K.L.K. prepared  
121 tables and figures, and wrote the manuscript. C.E., S.G., K.L.B. and J.M.W. generated  
122 data and supervised data generation. W.E., T.N. and B.E.H. performed validation  
123 experiments and analyses. M.J.W., M.P.-Y., L.K.W., A.M.L., J.C.C., E.F., H.H., P.M.S., A.C.W.,  
124 A.D., K.G.T. and S.T.W. performed replication analyses. E.G.B., D.S., E.B.B., H.J.F., J.R.R.-  
125 S., K.M., M.A.L., P.C.A., R.K., S. Sen, S.T. and W.R.-C. recruited study subjects. S. Salazar  
126 coordinated recruitment and maintained phenotype data quality. C.A.W., A.M.-E. and  
127 K.S. contributed Native American samples. TOPMed team provided variants  
128 annotation.

129 **COMPETING FINANCIAL INTERESTS**

130 The authors declare no competing financial interests.

131 **ABSTRACT**

132 Albuterol, a bronchodilator medication, is the first-line therapy for asthma treatment  
133 worldwide. However it has a wide variation of drug response among different  
134 racial/ethnic groups. We performed the largest pharmacogenetics study to date,  
135 using whole genome sequencing data from 1,441 minority children with asthma from  
136 the extremes of bronchodilator drug response (BDR) to albuterol. We identified  
137 population-specific and shared pharmacogenetic variants associated with BDR,  
138 including genome-wide significant and suggestive loci near genes previously  
139 associated with lung capacity (*DNAH5*), immunity (*NFKB1* and *PLCB1*), and  $\beta$ -  
140 adrenergic signaling pathways (*ADAMTS3* and *COX18*). Functional assays revealed  
141 that the BDR-associated SNP within *NFKB1* is in linkage disequilibrium with SNPs in  
142 a functionally active enhancer and is also associated with the expression of a  
143 neighboring gene *SLC39A8*. Our study expands the understanding of  
144 pharmacogenetic analyses in racially and ethnically diverse populations and  
145 advances the foundation for precision medicine in at-risk and understudied minority  
146 populations.

147



## 148 INTRODUCTION

149 Asthma is a chronic inflammatory disorder of the airways characterized by recurrent  
150 respiratory symptoms and reversible airway obstruction. Asthma affects 5% of the  
151 world population<sup>1</sup> and is the most common chronic diseases among children<sup>2,3</sup>. In the  
152 United States (U.S.), asthma is the most racially disparate health condition among  
153 common diseases<sup>4, 5</sup>. Specifically, U.S. asthma prevalence is highest among Puerto  
154 Ricans (36.5%), intermediate among African Americans (13.0%) and European  
155 Americans (12.1%), and lowest among Mexican Americans (7.5%)<sup>6</sup>. These disparities  
156 also extend to asthma mortality, which is four-fold higher in Puerto Ricans and  
157 African Americans compared to European and Mexican Americans<sup>7</sup>.

158 Current asthma guidelines recommend inhaled  $\beta_2$ -agonists (e.g., albuterol) for  
159 treatment of acute asthma symptoms. Albuterol is a short-acting  $\beta_2$ -adrenergic  
160 receptor ( $\beta_2$ AR) agonist and it produces bronchodilation by causing rapid smooth  
161 muscle relaxation in the airways. Albuterol is the most commonly prescribed asthma  
162 medication in the world and is the mainstay of acute asthma management across all  
163 ethnic groups<sup>8,9</sup>. Among low income and minority populations in the U.S., albuterol is  
164 often the only medication used for asthma regardless of asthma severity<sup>10, 11</sup>.  
165 Response to albuterol is quantified based on bronchodilator drug response (BDR)  
166 using spirometry. We and others have demonstrated that there is significant  
167 variability in BDR among individuals and between populations<sup>12, 13</sup>. Specifically, the  
168 populations with the highest asthma prevalence and mortality also have the lowest  
169 drug response to albuterol: Puerto Rican and African American children have

170 significantly lower BDR than European and Mexican American children<sup>13, 14</sup>. This  
171 variation in drug response across ethnic groups may contribute to the observed  
172 disparities in asthma morbidity and mortality<sup>15-19</sup>.

173 BDR is a complex trait, influenced by environmental and genetic factors, with  
174 heritability estimates ranging from 47% to 92%<sup>20-22</sup>. Genome-wide association  
175 studies (GWAS) have identified several common single nucleotide polymorphisms  
176 (SNPs) associated with BDR in populations of European descent<sup>23-25</sup>. To date, only  
177 one GWAS of BDR has been conducted among African Americans<sup>26</sup>. While that study  
178 identified a novel genic association with BDR, it did not replicate known associations  
179 discovered in populations of European descent, suggesting that BDR may be  
180 determined in part by population-specific variants. Our previous study of genetic  
181 predictors of BDR in Latino populations identified a significant contribution of  
182 population-specific rare variants to BDR<sup>27</sup>.

183 GWAS studies were designed to identify common variants associated with disease  
184 through the use of genotyping arrays that relied on linkage disequilibrium to  
185 tag/represent variants not explicitly genotyped on the array itself. Early GWAS arrays  
186 were optimized for performance in populations of European origin and lacked the  
187 ability to capture race-/ethnic-specific genetic variation due to differences in linkage  
188 disequilibrium (LD) across racially/ethnically diverse populations<sup>28</sup>. Recent  
189 generations of arrays have attempted to tailor genotyping panels for major HapMap  
190 populations (Affymetrix Axiom<sup>®</sup> World Arrays<sup>29</sup>), or to design array that includes  
191 population-specific and trans-ethnic tag SNPs derived from 1000 Genomes Project

192 and other consortia studying admixed populations to statistically infer genotypes not  
193 directly genotyped in diverse populations (Illumina Infinium® Multi-Ethnic  
194 Genotyping Array). However, imputation accuracy decreases significantly with  
195 variant frequency<sup>30, 31</sup>, making it difficult to use genotyping arrays to study rare  
196 and/or population-specific variants. The most striking weakness of GWAS studies  
197 was their inability to adequately capture rare variation.

198 Whole exome sequencing (WES), and other forms of targeted sequencing, were  
199 developed to address the inability of genotyping arrays to capture rare variation. WES  
200 only allows for the capture of common and rare variants within coding and flanking  
201 regions, but studies have shown that a large number of variants associated with  
202 complex disease lie within non-coding regions of the genome (reviewed in Zhang and  
203 Lupski, 2015<sup>32</sup>). Also, the target capture procedures result in uneven sequence  
204 coverage, limiting the reliability of SNP calling for loci close to the boundary of  
205 targeted regions. WES also has limited usage for the detection of structure variation,  
206 which depends heavily on uniform coverage across the genome.

207 Whole genome sequencing (WGS) is the ideal technology for identifying disease-  
208 causing variants that are rare and/or population-specific. Unlike GWAS genotyping  
209 arrays or targeted sequencing technologies, WGS allows the detection of both  
210 common and rare variants in both coding and non-coding regions. WGS is the only  
211 technology capable of a truly comprehensive and agnostic evaluation of genetic  
212 sequence variation in the context of complex disease. The persistent lack of large-  
213 scale genetic studies conducted in populations of non-European descent further

214 exacerbates racial/ethnic disparities in clinical and biomedical research<sup>33-35</sup>. The  
215 application of WGS to the evaluation of genetic factors within a racially/ethnically  
216 diverse study population is a necessary step towards eliminating health disparities in  
217 BDR and other complex phenotypes.

218 In this study, we performed WGS on 1,441 minority children with asthma from the  
219 tails of the BDR distribution. Our study included high and low drug responders from  
220 three ethnic groups: Puerto Ricans (PR) (n=483), Mexicans (MX) (n=483), and African  
221 Americans (AF) (n=475). We identified multiple BDR-associated common and rare  
222 variants that are population-specific or shared among populations. This study is part  
223 of the National Heart, Lung, and Blood Institute's Trans-Omics for Precision Medicine  
224 Whole Genome Sequencing (TOPMed) program and represents the largest WGS study  
225 thus far to investigate genetic variants important for bronchodilator drug response  
226 in racially and ethnically diverse children with asthma.

227

## 228 **RESULTS**

### 229 **Descriptive characteristics of study subjects**

230 Descriptive characteristics for all study subjects (n=1,441, including 483 Puerto  
231 Ricans, 483 Mexicans and 475 African Americans) are summarized in **Table 1**.  
232 Covariates and demographic variables were assessed for significant differences  
233 between high and low drug responders for each racial/ethnic group. Significant  
234 differences were only found for age (Mexicans,  $p < 0.001$ ) and baseline lung function  
235 (pre-FEV<sub>1</sub> % predicted,  $p < 0.001$ ), defined as the percentage of observed FEV<sub>1</sub> relative  
236 to the expected population average FEV<sub>1</sub> estimated using the Hankinson lung  
237 function prediction equations<sup>36</sup>.

238 We estimated genetic ancestry for all participants (see **Methods**) and found that  
239 the largest ancestry proportions in Puerto Ricans, Mexicans and African Americans  
240 are European, Native American and African ancestries, respectively (**Table 1**,  
241 **Supplementary Fig. 1**). Analysis of genetic substructure of the three admixed  
242 populations by principal component analysis (PCA) demonstrated that the three  
243 populations displayed the characteristic spectrum of ancestry found in admixed  
244 populations (**Supplementary Fig. 2**).

### 245 **Variant summary statistics**

246 Genetic variant summary statistics revealed that the average number of variants by  
247 population corresponded to the proportion of African ancestry: the most variants

248 were found among African Americans, followed by Puerto Ricans and Mexicans (**Fig.**  
249 **1a, Table 2**).

250 The majority of observed variants (>90%) were SNPs. The union of biallelic SNPs  
251 from all individuals in each population varied from 28.1M among Mexicans, 29.2M  
252 among Puerto Ricans to 36.3M among African Americans. Approximately 65% of  
253 biallelic SNPs were rare (non-reference allele frequency < 1%, **Fig. 1b, Table 2**).  
254 Biallelic SNPs that were population-specific (i.e., the SNPs were only found in one  
255 population) accounted for 23% (6.68M / 29.2M in Puerto Ricans) to 39% (14.1M /  
256 36.3M in African Americans) of the biallelic SNPs observed in each population. Over  
257 99% of the population-specific SNPs had a non-reference allele frequency less than  
258 5% and a majority of these population-specific SNPs (69% to 82%) were also  
259 singletons (**Fig. 1c, Table 2**). Based on dbSNP build 147, an average of 20% of biallelic  
260 SNPs were novel (**Fig. 1d, Table 2**).

261 In all three populations, 99% of the biallelic SNPs were observed in noncoding  
262 regions. Based on the Combined Annotation Dependent Depletion (CADD) score<sup>37</sup>,  
263 which estimates a variant's deleteriousness, over 99% of highly deleterious biallelic  
264 SNPs (CADD score  $\geq 25$ ) were observed in coding regions, regardless of ethnicity  
265 (**Table 3**). This may be due to the relatively limited availability of functional  
266 annotations as positive training data for CADD to estimate deleteriousness in non-  
267 coding regions<sup>38</sup>. The percentage of singletons in these highly deleterious biallelic  
268 SNPs varied from 51% (Puerto Ricans) to 70% (Mexicans).

269 **BDR association testing with common variants**

270 We performed genome-wide association testing of common variants with BDR  
271 (dichotomized as high/low drug responders from the extremes of BDR distribution)  
272 for each population, adjusting by age, sex, body mass index (BMI) categories, and the  
273 first ten principal components (PCs) (see **Methods** section “Single locus BDR  
274 association testing on common variants” for rationale on including these covariates).  
275 We then performed a trans-ethnic meta-analysis on these results across all three  
276 populations. A universal  $p$ -value threshold of  $5.00 \times 10^{-8}$  is often used to determine  
277 significance in GWAS studies. This statistical threshold was calculated based on the  
278 Bonferroni correction under the assumption of 1,000,000 independent tests and may  
279 not be appropriate for WGS studies. It has also been shown, using both GWAS and  
280 WGS data, that the number of effective independent tests varies by LD patterns, which  
281 in turn vary by race/ethnicity<sup>39</sup>. We calculated the effective number of independent  
282 tests for each population, and for our trans-ethnic meta-analysis, and generated  
283 appropriately adjusted genome-wide significance thresholds (see **Methods**).  
284 Population-specific genome-wide significance thresholds after correcting for the  
285 number of effective tests (adjusted genome-wide significance level) were  $1.57 \times 10^{-7}$   
286 for Puerto Ricans,  $2.42 \times 10^{-7}$  for Mexicans, and  $9.59 \times 10^{-8}$  for African Americans (see  
287 **Methods**). These numbers are highly concordant with WGS significance thresholds  
288 derived from the African America (ASW), Mexican (MXL), and Puerto Rican (PUR)  
289 1000 Genomes sequencing data<sup>39</sup>. For our trans-ethnic meta-analysis, the adjusted  
290 genome-wide significance level was  $3.53 \times 10^{-7}$ .

291 Two SNPs, rs17834628 and rs35661809, located on chromosome 5 were  
292 significantly associated with BDR ( $p = 1.18 \times 10^{-8}$  and  $3.33 \times 10^{-8}$ , respectively, **Fig. 2a**  
293 **and Table 4**). **Figure 2b** shows that the direction of effect of the top associated SNP  
294 (rs17834628) is the same in all three populations. **Figure 2c** displays a LocusZoom  
295 plot of rs17834628 with 400kb flanking regions. We attempted to replicate this SNP  
296 in our replication cohorts (GALA I, SAGE I, HPR, SAPPHIRE and CHOP) separately and  
297 via meta-analysis. However, the SNP did not show significant association with BDR  
298 (replication  $p > 0.05$ ).

299 It has been shown that functionally relevant variants do not always display the  
300 lowest  $p$ -values in association studies<sup>40</sup>. As this is the first study of this scope to be  
301 performed in diverse study populations, we decided to also investigate “suggestive”  
302 loci ( $p \leq 7.06 \times 10^{-6}$ , see **Methods** for definition of suggestive significance level) to  
303 identify variants with functional relevance. After merging SNPs with high LD ( $r^2 \geq 0.8$ )  
304 into unique loci, 11 other unique loci were identified at a suggestive significance level  
305 ( $p \leq 7.06 \times 10^{-6}$ ) (**Fig. 2a**). The top 10 unique loci (represented by 27 SNPs) and their  
306 nearest genes are listed in **Table 4**, with the most significant SNP (lowest  $p$ -value) for  
307 each locus marked by asterisk. All but three of these SNPs are intergenic; two SNPs  
308 mapped to introns 3 and 5 of *NFKB1* (chromosome 4, rs28450894 and rs4648135),  
309 and another mapped to intron 7 of *PLCB1* (chromosome 20, rs16995064).

310 Among the *NFKB1* SNPs, the low BDR-associated T allele of rs28450894 is found  
311 predominantly among African populations (minor allele frequency [MAF] 8.8% -  
312 28.7%), followed by European populations (MAF 3.7% - 7.6%) and Puerto Ricans



313 (MAF 6.2%), and is relatively rare in Mexicans (MAF 1.5%) based on 1000 Genomes  
314 data (**Supplementary Fig. 3**). Using ChIP-Seq, we identified potential regulatory  
315 regions marked by H3K27ac peaks in primary bronchial smooth muscle cells  
316 (BSMCs). We found that SNPs in moderate to high LD ( $r^2 = 0.47$  to  $0.82$ ) with  
317 rs28450894 overlapped with H3K27ac ChIP-Seq peaks identified in BSMCs, implying  
318 that they may have regulatory functions (**Supplementary Fig. 4a**). The regulatory  
319 function of two H3K27ac peak regions overlapping variants in LD ( $r^2 \geq 0.8$ ) with  
320 rs28450894 was then functionally validated using luciferase enhancer assays. These  
321 sequences were cloned into the pGL4.23 enhancer assay vector (Promega), which  
322 contains a minimal promoter and a luciferase reporter gene. The ApoE liver enhancer  
323 was used as a positive control, and pGL4.23 empty vector as a negative control. All  
324 constructs were tested for their enhancer activity in BSMCs. One enhancer, *NFKB1*  
325 Region 2, showed significantly increased enhancer activity over empty vector (2.24  
326 fold increase,  $p = 8.70 \times 10^{-6}$ , unpaired t-test; **Supplementary Fig. 4b**).

327 Given the relevance of *NFKB1* in immune pathways and asthma, we used RNA  
328 sequencing (RNA-seq) to verify whether the identified intronic *NFKB1* SNPs regulate  
329 gene expression of neighboring genes. Among genes within 1Mb of rs28450894  
330 meeting expression reliability cutoffs (see **Methods**), we found that the low BDR-  
331 associated T allele of rs28450894 is significantly associated with decreased  
332 expression of *SLC39A8* in blood (**Supplementary Fig. 5**,  $p = 0.0066$ , FDR-adjusted  $p$   
333 =  $0.0856$ ,  $\log_2(\beta) = -0.327$ ).

334 We did not find SNPs associated with BDR at genome-wide significance levels in  
335 any of the population-specific analyses (**Supplementary Fig. 6**).

336 Previously reported GWAS-based BDR-associated common variants in GALA II did  
337 not replicate in the current study<sup>27</sup>. To distinguish whether the discrepancy between  
338 findings was due to data type (imputed array-based vs. WGS-based) or study design  
339 (continuous trait vs. extreme phenotype), the common variant analysis in the current  
340 analysis was repeated among the subset of samples that had both array-based and  
341 WGS data (n = 1,414 out of 1,441). Based on the top 1000 BDR-associated SNPs, there  
342 was a high correlation between association *p*-values generated from imputed array-  
343 based and WGS-based genotypes (Spearman correlation = 1.0), indicating that data  
344 type is not the cause of the observed discrepancy (**Supplementary Fig. 7a**). Nearly  
345 all SNPs with high imputation  $r^2$  exhibited low genotype discordance between array-  
346 based and WGS-based genotypes, confirming high imputation quality of most  
347 common SNPs ( $\geq 99.7\%$ ). (**Supplementary Fig. 7b and 7c**). Using imputed array-  
348 based data, we also performed linear regression using BDR ( $\Delta FEV_1$ ) as a continuous  
349 trait. Both of the genome-wide significant BDR-associated SNPs have the same  
350 direction of effect in the meta-analysis ( $\beta=0.51$ ) as the extreme phenotype study  
351 design (OR=1.67, **Table 4**), although the *p*-value was not genome-wide significant.  
352 This indicates that the discrepancy between findings may be due to the power of  
353 different study designs (continuous trait vs. extreme phenotype) for individual SNP  
354 to reach genome-wide significant level.

355 **BDR association testing using rare variants**

356 We tested the combined effects of rare variants on BDR using SKAT-O<sup>41</sup> by grouping  
357 common and rare variants into 1kb sliding windows, which moved across the genome  
358 in 500bp increments. The same covariates used for common variant association  
359 testing were applied.

360 After identifying the effective number of tests and adjusting for multiple  
361 comparisons on each population separately (see **Methods**), we identified three  
362 population-specific loci associated with BDR at genome-wide significance levels ( $p \leq$   
363  $8.15 \times 10^{-8}$  for Puerto Ricans,  $p \leq 8.60 \times 10^{-8}$  for Mexicans and  $p \leq 6.94 \times 10^{-8}$  for  
364 African Americans) (**Fig. 3a-c**). The associated windows in these loci and their  
365 nearest genes are listed in **Table 5**.

366 We also performed association testing using subjects across all three populations  
367 in a single analysis. Pooling subjects increased the sample size and thereby  
368 maximized the power of the association test. To minimize any potential effect of  
369 confounding by population substructure, we included local genetic ancestry, defined  
370 as the proportions of Native American and African ancestries for the window under  
371 testing, as additional covariates in the association test. Two loci on chromosomes 4  
372 and 8 were found to be genome-wide significant ( $p \leq 1.53 \times 10^{-7}$ ) (**Fig. 3d, Table 5**).

373 We examined alternative grouping strategies for rare variants, including grouping  
374 (1) by genes from transcription start to end sites with or without 50kb flanking  
375 regions, (2) by transcription start site with 20kb flanking regions, and (3) by H3K27ac  
376 peaks from chromatin immunoprecipitation sequencing analysis (ChIP-Seq) on

- 377 airway epithelial cells and airway smooth muscle cells. Association tests with these
- 378 alternate grouping strategies identified no further significant associations.

379 **DISCUSSION**

380 In this study, we have identified population-specific and shared common and rare  
381 variants that are associated with bronchodilator drug response in three ethnically  
382 diverse populations of children with asthma. WGS, unlike GWAS genotyping arrays  
383 and targeted sequencing, provides a comprehensive detection of both common and  
384 rare variants in both coding and non-coding regions. African Americans, Latinos, and  
385 other minorities have been dramatically underrepresented in GWAS studies<sup>33-35</sup>. The  
386 present study presents an important initiative and investment from the NIH/NHLBI  
387 to include underrepresented populations in large whole genome sequencing efforts  
388 and to improve racial/ethnic diversity in clinical and biomedical research.

389 Our trans-ethnic common variants meta-analysis identified one locus on  
390 chromosome 5 that was associated with BDR at a genome-wide significance level ( $p$   
391  $< 5.00 \times 10^{-8}$ ). The proximity of this BDR-associated locus to *DNAH5* and *LINC01194*  
392 is of particular interest. A SNP in *DNAH5* has been associated with total lung capacity  
393 in white subjects with chronic obstructive pulmonary disease<sup>42</sup>. In a separate GWAS,  
394 the *DNAH5/LINC01194* locus was reported among Europeans to be associated with  
395 levels of IgE<sup>43, 44</sup>, a biomarker associated with asthma endotypes. Baseline lung  
396 function (FEV<sub>1</sub>) and total IgE levels are associated with asthma severity and can  
397 predispose an individual to lower bronchodilator drug responsiveness<sup>13, 14, 45</sup>. Two  
398 *NFKB1* intronic variants on chromosome 4 were associated with BDR at a suggestive  
399 significance level. The NFκB protein has a known role in allergic response, and  
400 various studies have demonstrated that the NFκB pathway is activated in patients

401 with asthma, as reviewed by Edwards *et al.*<sup>46</sup>. Bronchodilator drug responsiveness  
402 may thus be modulated by an individual's baseline airway allergic status. ChIP-seq  
403 and functional enhancer assays in BSMCs suggest these *NFKB1* intronic variants may  
404 regulate expression of nearby genes. This was in fact supported by our RNA-seq data,  
405 which showed that individuals with the low BDR associated genotype displayed  
406 reduced expression of the neighboring gene *SLC39A8*, a gene which has previously  
407 been found to be responsive to cytokine treatment in airway epithelial cells<sup>47</sup> and had  
408 reduced expression in mice with allergic airway inflammation<sup>48</sup>. Recent studies have  
409 also shown that *SLC39A8* is unique among other zinc transporters in that  
410 upregulation of *SLC39A8* is sufficient to protect lung epithelia against TNF- $\alpha$ -induced  
411 cytotoxicity<sup>49</sup>. Additionally, the higher frequency of the low BDR-associated allele (T  
412 allele of rs28450894 in *NFKB1*) in African populations suggests that the low BDR-  
413 associated allele tracks with African ancestry. This may explain why admixed  
414 populations with higher proportions of African ancestry, i.e., African Americans and  
415 Puerto Ricans, have lower bronchodilator drug responsiveness, and by extension may  
416 shed light on the higher asthma morbidity and mortality in these populations<sup>14</sup>.  
417 Another intronic variant (chromosome 20, rs16995064, *PLCB1* intron 7) was  
418 associated with BDR at a suggestive significance level. *PLCB1* is highly relevant, as this  
419 gene has been reported to be differentially expressed in therapy-resistant childhood  
420 asthma compared to controlled persistent asthma or age-matched healthy control  
421 subjects in a Swedish cohort<sup>50</sup>. Functional studies also reported that silencing *PLCB1*  
422 inhibited the effect of lipopolysaccharide-induced endothelial cell inflammation

423 through inhibiting expression of proinflammatory cytokines<sup>51</sup>. Further functional  
424 studies are necessary to establish the role of *NFKB1* and *PLCB1* on BDR.

425 Apart from assessing the individual effect of common variants on BDR, we also  
426 identified various combined effects of rare variants that were population-specific or  
427 shared across populations. This includes the chromosome 1 locus in intron 9 of *MAGI3*  
428 and the chromosome 11 intergenic locus between *LOC105376671* and *LIN7C* for  
429 Mexicans, the chromosome 19 intron 3 locus in *FDX1L* for African Americans, and the  
430 chromosome 4 intergenic locus between *ADAMTS3* and *COX18* and the chromosome  
431 8 locus in intron 4 of *CPQ* shared across populations.

432 While some of the genes are uncharacterized or have no known function related to  
433 BDR (*MAGI3*, *LOC105376671*, *LIN7C*, *FDX1L* and *CPQ*), there appears to be functional  
434 relevance for the locus between *ADAMTS3* and *COX18*. The *ADAMTS3* and *COX18* loci  
435 were associated with  $\beta$ -adrenergic responses in cardiovascular-related traits in  
436 mice<sup>52</sup>. This locus was significantly associated with cardiac atrial weight in mice  
437 treated with the  $\beta$  blocker atenolol; the association also replicated in mice treated  
438 with the  $\beta$  agonist isoproterenol. These findings suggest that SNPs found in this locus  
439 may modify adrenergic signaling pathways in BDR. In the present study, we also  
440 identified BDR association with rare variants within the *CPQ* gene, which encodes a  
441 protein from the carboxypeptidase family. Although no previous association has been  
442 identified for *CPQ*, another member of the carboxypeptidase family,  
443 carboxypeptidase A3 (*CPA3*), is known to be expressed at higher levels in the airway

444 epithelium among subjects with T<sub>H</sub>2-high asthma<sup>53, 54</sup>. Further studies are necessary  
445 to determine the role of CPQ in BDR.

446 GWAS-based BDR-associated common variants in GALA II have previously been  
447 reported<sup>27</sup>. However, these variants did not replicate in the current study, likely due  
448 to two major differences between the previous and current investigations: study  
449 design and data type. The previous BDR GWAS used an array-based genotyping panel  
450 to examine children with asthma across the entire BDR spectrum, i.e., BDR ( $\Delta$ FEV<sub>1</sub>)  
451 was used as a continuous variable. In contrast, the current study sequenced the entire  
452 genome to investigate only the extremes of the BDR ( $\Delta$ FEV<sub>1</sub>) distribution (i.e.,  
453 high/low drug responders). By repeating our current analysis using a subset of  
454 individuals that had both array and WGS data, we confirmed that the major  
455 discrepancy between the two studies is due to study design instead of differences in  
456 data type. The contrast in results between GWAS and WGS due to differences in study  
457 design implies that varied study designs are necessary for a comprehensive  
458 understanding of variants associated with asthma-related phenotypes and drug  
459 response. Studying samples from the extreme tail of drug response distributions has  
460 been recognized as one of the success factors in the study design of pharmacogenomic  
461 GWAS<sup>55</sup>. Furthermore, it was recently demonstrated that the power gain from  
462 studying extreme phenotypes is much greater in rare variant studies<sup>56</sup>. Since cost is  
463 often a limiting factor for WGS studies, choosing an extreme phenotypic study design  
464 may be beneficial for the study of rare variants and the discovery of common variant



465 associations that may otherwise be missed when sampling across the entire  
466 phenotypic spectrum.

467 In this study, we did not identify BDR-associated variants from  $\beta_2$ AR signaling  
468 pathways. Instead, most of the BDR-associated genes identified in this study are  
469 related to lung function and allergic response, including total IgE levels and cytokine  
470 production in mast cells. This suggests that at least part of BDR may be due to the  
471 predisposition or intrinsic state of airway smooth muscle cells. Individuals may have  
472 different intrinsic expression levels of candidate genes determined by genetic  
473 variants, which determine whether their response to albuterol is beneficial.

474 A higher percentage of African ancestry often implies a higher degree of genetic  
475 variation<sup>57</sup>. Although Puerto Ricans have higher proportions of African ancestry than  
476 Mexicans (**Table 1**), they have fewer population-specific SNPs, an observation that is  
477 consistent with findings from the 1000 Genomes Project<sup>58</sup>. This is likely due to the  
478 fact that our Puerto Rican subjects, who were mostly recruited from Puerto Rico, have  
479 gone through recent population bottlenecks. We have demonstrated that Puerto  
480 Ricans may be more genetically related than expected<sup>59</sup>, suggesting that our current  
481 relatedness filters may be too conservative for Puerto Ricans.

482 Including admixed populations in whole genome sequencing studies has  
483 important scientific implications. First, it allows for discovery of genetic variation of  
484 multiple ancestral populations in a single study. Second, it is extremely useful to study  
485 admixed populations with ancestries that are currently underrepresented in existing  
486 genetic repositories. For example, the widely popular PCSK9 inhibitors used to treat

487 hypercholesterolemia were discovered by studying the genetics of African Americans  
488 but the biology and final drug development have benefited all patients regardless of  
489 race/ethnicity<sup>60</sup>. On a genetic research level, studying admixed populations such as  
490 Mexicans will enhance the understanding of genetic variation in Native American  
491 ancestry, an area that is currently lacking in all major sequencing efforts.

492 Although an extensive effort was made to replicate the top BDR-associated  
493 variants, we were unable to replicate our results because few studies of non-  
494 European populations exist, as we and others have documented<sup>33-35, 61</sup>. Our efforts to  
495 perform replication of rare BDR-associated variants were further hindered by the  
496 lack of studies with whole genome sequencing data. These challenges highlight the  
497 need to include more racially/ethnically diverse populations in all clinical and  
498 biomedical research.

499 In an era of precision medicine, addressing questions about the impact of genetic  
500 factors on therapeutic drug response in globally diverse populations is essential for  
501 making precision medicine socially and scientifically precise<sup>4</sup>. This study advances  
502 our understanding of genetic analysis in admixed populations and may play an  
503 important role in advancing the foundation of precision medicine for understudied  
504 and racial/ethnically diverse populations.

505 **ONLINE METHODS**

506 **Data availability**

507 TOPMed whole genome sequencing data is available to download by submitting data  
508 access request through dbGaP. The dbGaP study of GALA II and SAGE are  
509 phs000920.v1.p1 and phs000921.v1.p1.

510 **Study cohorts and sample details**

511 This study examined a subset of subjects with asthma from the Study of African  
512 Americans, Asthma, Genes & Environments (SAGE II)<sup>62-65</sup> and the Genes-  
513 Environments & Admixture in Latino Americans (GALA II) study<sup>27</sup>. SAGE II recruited  
514 African American subjects from the San Francisco Bay area. GALA II recruited Latino  
515 subjects from Puerto Rico and the mainland United States (Bronx, NY; Chicago, IL;  
516 Houston, TX; San Francisco Bay Area, CA). Ethnicity of the subjects was self-reported  
517 and all four of the participant's biological grandparents must have reported the same  
518 ethnicity.

519 A total of 1,484 individuals from three ethnic groups (494 Puerto Ricans, 500  
520 Mexicans and 490 African Americans), representing the extremes of the  
521 bronchodilator response (BDR, see below) distribution were selected for whole  
522 genome sequencing. Genomic DNA was extracted and purified from whole blood  
523 using Wizard® Genomic DNA Purification Kits (Promega, Fitchburg, WI).

## 524 **Bronchodilator response measurements**

525 Spirometry was performed and BDR ( $\Delta$ FEV<sub>1</sub>) was calculated as previously  
526 described<sup>27</sup>. In brief, BDR was calculated as the percent change in FEV<sub>1</sub> after 2 doses  
527 of albuterol (post-FEV<sub>1</sub>) compared with baseline values before administration of  
528 albuterol (pre-FEV<sub>1</sub>).

## 529 **Analysis on descriptive data of study subjects**

530 Dichotomous variables were tested for association with BDR using Fisher's exact test.  
531 Continuous variables were tested for normality using the Shapiro-Wilk test. Normally  
532 and non-normally distributed continuous variables were tested using Student's t-test  
533 and the Wilcoxon rank sum test, respectively.

## 534 **Sample quality control and whole genome sequencing**

535 DNA samples were quantified by fluorescence using the Quant-iT PicoGreen dsDNA  
536 assay (ThermoFisher Scientific, Waltham, MA, USA) on a Spectramax fluorometer  
537 (Molecular Devices, Sunnyvale, CA, USA). Sample integrity was ascertained using the  
538 Fragment Analyzer™ (Advanced Analytical Technologies, Inc., Ankeny, IA, USA).  
539 Samples passing QC were genotyped using the HumanCoreExome-24 array  
540 (Illumina®, San Diego, CA, USA). Genotyping results were analyzed using  
541 VerifyIDintensity<sup>66</sup> to flag sample contamination. Sequencing libraries were  
542 constructed using the TruSeq PCR-free DNA HT Library Preparation Kit (Illumina®,  
543 San Diego, CA, USA) with 500ng DNA input. Briefly, genomic DNA was sheared using  
544 a Covaris sonicator (Covaris, Woburn, MA), followed by end-repair and bead-based

545 size selection of fragmented molecules. Selected fragments were then A-tailed, and  
546 sequence adaptors were ligated onto the fragments, followed by a final bead  
547 purification of the libraries. Final libraries were reviewed for size distribution using  
548 Fragment Analyzer and quantified by qPCR (Kapa Biosystems, Wilmington, MA, USA).  
549 Libraries were sequenced on HiSeq X system (Illumina®, San Diego, CA, USA) with v2  
550 chemistry, using a paired-end read length of 150 bp, to a minimum of 30x mean  
551 genome coverage.

### 552 **WGS data processing and quality control**

553 Sequencing data were demultiplexed using bcl2fastq version 2.16.0.10 (Illumina),  
554 and aligned to the human reference hs37d5 with decoy sequences using BWA-MEM  
555 v0.7.8<sup>67</sup>. Data were further processed using the GATK best-practices v3.2-2 pipeline<sup>68</sup>.  
556 Quality control procedures included marking of duplicate reads using Picard tools  
557 v1.83 (<http://picard.sourceforge.net>), realignment around indels, and base quality  
558 recalibration using 1000 Genomes Phase 1 high confidence SNPs, HapMap v3.3,  
559 dbSNP v137, 1000 Genomes omni2.5, 1000 Genomes Phase 1 indels, and, Mills and  
560 1000 Genomes gold standard indels. Single-sample genotypes were called using  
561 GATK HaplotypeCaller followed by joint genotyping of all subjects. The resulting  
562 multi-sample Variant Call Format (VCF) file was used for variant quality score  
563 recalibration (VQSR). A 99.8% truth sensitivity tranche level was used for SNPs and  
564 99.0% for indel variants. SNP calls were used to check for sample contamination using  
565 VerifyBAMId<sup>66</sup>, and sample identity was confirmed by requiring > 99.5%  
566 concordance with SNP array (HumanCoreExome-24 array) genotypes.

567 As part of NIH's Trans-Omics for Precision Medicine (TOPMed) Program, BAM files  
568 were submitted to the Informatics Resource Center (IRC) at the University of  
569 Michigan. All 1,484 samples sequenced passed TOPMed's IRC quality control metrics  
570 (mean genome coverage >30x; >95% of genome covered at >10x; and <3%  
571 contamination).

572 VCF-level variants were filtered by GATK version 3.4.46 and VCFtools version  
573 0.1.14<sup>69</sup>. Variants were filtered according to the following procedures: (1) remove  
574 variants that were not indicated as "PASS" in the VCF FILTER column, (2) remove  
575 variants in low complexity regions<sup>70</sup> (downloaded from [https://github.com](https://github.com/lh3/varcmp/tree/master/scripts/LCR-hs37d5.bed.gz)  
576 [/lh3/varcmp/tree/master/scripts/LCR-hs37d5.bed.gz](https://github.com/lh3/varcmp/tree/master/scripts/LCR-hs37d5.bed.gz)), and (3) keep sample  
577 genotypes that have minimum read depths of 10 and genotype qualities of 20 (DP ≥  
578 10 and GQ ≥ 20). The ratio of heterozygous to homozygous variants (hom/het), ratio  
579 of transitions to transversions (Ti/Tv), and other variant summary statistics were  
580 generated using GATK VariantEval. VCF files were converted into PLINK format using  
581 PLINK v1.9 software<sup>71</sup> according to recommended best practices<sup>72</sup>. Genotype  
582 consistency between WGS data and previously published Axiom<sup>®</sup> Genome-Wide LAT  
583 1 array (Affymetrix, Santa Clara, CA) genotype data (dbGaP phs000920.v1.p1 and  
584 phs000921.v1.p1) were assessed using VCFtools<sup>69</sup>. Individuals with percentage  
585 consistency three S.D. below the mean (< 96.3%) were removed (n=7,  
586 **Supplementary Fig. 8**). Cryptic relatedness was detected using REAP<sup>73</sup>. Global  
587 ancestry and allele frequency used by REAP were estimated using ADMIXTURE in  
588 supervised mode<sup>74</sup>. Related individuals (kinship coefficient > 0.044, corresponding to

589 a third degree relationship<sup>75</sup>) were excluded from further analysis (n=36), yielding a  
590 final sample size of 1,441 for downstream analysis. Downstream analyses were only  
591 performed on biallelic SNPs that passed all quality filters mentioned above and had  
592 less than 10% of genotype missingness. The 10% genotype missingness filter was  
593 applied per population instead of across all three populations except for the rare  
594 variant analysis performed with all three populations combined (see **Methods**  
595 section “Multi-variant analyses of combined effects of rare variants on BDR”).

### 596 **Principal component analysis**

597 Principal component analysis (PCA) was performed to control for hidden population  
598 substructure using EIGENSTRAT’s smartpca program<sup>76</sup>. After removing biallelic SNPs  
599 with low minor allele frequency ( $MAF \leq 0.05$ ) and in linkage disequilibrium ( $r^2 > 0.5$   
600 in a 50-SNP window with a shift size of 5 SNPs) using PLINK1.9, 710,256 variants  
601 were used as input to smartpca.

### 602 **Local ancestry estimation**

603 Reference genotypes for European and African ancestries were obtained from the  
604 Axiom<sup>®</sup> Genotype Data Set ([http://www.affymetrix.com/support/technical/  
605 sample\\_data/axiom\\_db/axiomdb\\_data.affx](http://www.affymetrix.com/support/technical/sample_data/axiom_db/axiomdb_data.affx)) and SNPs with less than a 95% call rate  
606 were removed. Since no Native American reference samples are available in the  
607 HapMap database, reference genotypes for Native American ancestry were generated  
608 from 71 Native American individuals previously genotyped on the Axiom<sup>®</sup> Genome-  
609 Wide LAT 1 array<sup>27</sup>.

610 To call local ancestry tracts, we first created a subset of our WGS data  
611 corresponding to sites found on the Axiom® Genome-Wide LAT 1 array, leaving  
612 765,321 markers. Using PLINK1.9, we merged these data with our European (CEU),  
613 African (YRI), and Native American (NAM) reference panels, which overlapped at  
614 434,145 markers. After filtering multi-allelic SNPs and SNPs with > 10% missing data,  
615 we obtained a final merged dataset of 428,644 markers. We phased all samples using  
616 SHAPEIT2<sup>77</sup> and called local ancestry tracts jointly with RFMix<sup>78</sup> under a three-way  
617 admixture model based on the African, European, and Native American reference  
618 genotypes described above.

#### 619 **Variant annotation**

620 TOPMed freeze 2 and 3 variants were annotated using the WGSa annotation  
621 pipeline<sup>79</sup>. Annotated VCF files were downloaded from the TOPMed Data  
622 Coordinating Center SFTP sites.

#### 623 **Single locus BDR association testing on common variants**

624 An additive logistic regression model was used to evaluate the association of biallelic  
625 common variants (MAF > 1%) with BDR using PLINK 1.9 separately for each  
626 population. Throughout this study, high drug responders were assigned as cases.  
627 Logistic regression models included the covariates age, sex and body mass index  
628 (BMI) categories to account for previously reported confounders of asthma and  
629 BDR<sup>80-87</sup>, and the first ten principal components (PCs) to correct for population  
630 substructure in admixed populations. BMI and age- and sex-specific BMI percentiles



631 (BMI-pct) were calculated as previously described<sup>65</sup> and used for assignment to BMI  
632 categories. For subjects aged 20 years and over, BMI categories were defined as  
633 follows: underweight (BMI < 18), normal (18 ≤ BMI < 25), overweight (25 ≤ BMI <  
634 30) and obese (BMI ≥ 30). For subjects under 20 years of age, BMI categories were  
635 defined as follows: underweight (BMI-pct < 5), normal (5 ≤ BMI-pct < 85), overweight  
636 (85 ≤ BMI-pct < 95) and obese (BMI-pct ≥ 95). Baseline lung function (pre-FEV<sub>1</sub>) has  
637 a significant impact on how much further a participant can respond to albuterol.  
638 Nevertheless, we did not explicitly include pre-FEV<sub>1</sub> as a covariate since the variation  
639 in pre-FEV<sub>1</sub> was captured by the ten PCs already included in the model  
640 (**Supplementary Table 1**). In addition, the BDR (ΔFEV<sub>1</sub>) calculation has already  
641 adjusted for pre-FEV<sub>1</sub> (see **Methods** section “Bronchodilator response  
642 measurements”). Correlation and test for association between pre-FEV<sub>1</sub> and PCs  
643 were based on Spearman correlation. Population-specific genome-wide significance  
644 thresholds for the single locus analyses were calculated based on genotypes using the  
645 autocorrelation-based *effective size()* function in the R package ‘*coda*’ as published by  
646 Sobota *et al.*<sup>39</sup>. Population-specific genome-wide significance thresholds after  
647 adjusting for the effective number of effective tests (adjusted genome-wide  
648 significance) were  $1.57 \times 10^{-7}$  for Puerto Ricans,  $2.42 \times 10^{-7}$  for Mexicans, and  $9.59 \times$   
649  $10^{-8}$  for African Americans. Suggestive significance thresholds were calculated by one  
650 divided by the effective number of tests<sup>88</sup>. The local linkage disequilibrium pattern  
651 (Genome build: hg19/1000 Genomes Nov 2014 AMR) of the flanking regions of BDR-  
652 associated SNPs was visualized using LocusZoom<sup>89</sup>. Quantile-quantile (q-q) plots

653 were generated using a uniform distribution as the expected  $p$ -value distribution  
654 (**Supplementary Fig. 9a-c**). The genomic inflation factor ( $\lambda_{GC}$ ) was calculated using  
655 the R package ‘*gap*’.

#### 656 **Trans-ethnic meta-analysis of common variant effects on BDR**

657 A meta-analysis of the effects of common variants on BDR across the three  
658 populations was performed using METASOFT<sup>90</sup>. We used the Han and Eskin’s random  
659 effects model optimized for detecting associations under heterogeneous genetic  
660 effects from different study conditions<sup>90</sup>. The number of effective tests was estimated  
661 using the R package ‘*coda*’ as described above, yielding an adjusted genome-wide  
662 significance threshold of  $3.53 \times 10^{-7}$  and a suggestive significance threshold of  $7.06 \times$   
663  $10^{-6}$ . Suggestive significance thresholds were calculated by one divided by the  
664 effective number of tests<sup>88</sup>. Allele frequency variation in the world population was  
665 visualized using the Geography of Genetic Variants Browser (GGV) beta v0.92  
666 (<http://www.popgen.uchicago.edu/ggv>, accessed 9/30/2016). The q-q plot and  $\lambda_{GC}$   
667 were generated in the same way as described above (**Supplementary Fig. 9d**, see  
668 **Methods** section, “Single locus BDR association testing on common variants”).

#### 669 **Multi-variant analyses of combined effects of rare variants on BDR**

670 Combined effects of rare variants on BDR was analyzed using SKAT-O<sup>41</sup>. Rare variants  
671 were collapsed into 1kb windows sliding across the GRCh37 genome in steps of 500  
672 base pairs. A total of 5.3 million windows were analyzed and the R package ‘*coda*’ was  
673 used to determine the number of effective tests using autocorrelation of the

674 association  $p$ -value, as described above. Adjusted genome-wide significance  
675 thresholds for Puerto Ricans ( $8.15 \times 10^{-8}$ ), Mexicans ( $8.60 \times 10^{-8}$ ), African Americans  
676 ( $6.94 \times 10^{-8}$ ) and for all three populations combined ( $1.53 \times 10^{-7}$ ) were used to  
677 determine windows of variants with genome-wide significant association with BDR.  
678 The same covariates used for common variant association testing were used for  
679 analyses of individual populations. For analyses of individuals combined across all  
680 three populations, we avoided confounding from population substructure by  
681 including local ancestry as additional covariates, defined as the proportions of Native  
682 American and African ancestries for the window under testing. The  $q$ - $q$  plots and  $\lambda_{GC}$   
683 were generated in the same way as described above (**Supplementary Fig. 10**, see  
684 **Methods** section, “Single locus BDR association testing on common variants”).

#### 685 **Single locus BDR association and trans-ethnic meta-analysis of array data**

686 To address the discrepancy between our current common variant analysis results  
687 with previously published BDR GWAS results<sup>27</sup>, we used 1,414 of the 1,441  
688 individuals who had both Axiom<sup>®</sup> Genome-Wide LAT 1 array (see **Methods** section,  
689 “WGS data processing and QC”) and WGS data available to rerun the single locus BDR  
690 association testing and trans-ethnic meta-analysis. Array data were imputed to the  
691 Haplotype Reference Consortium<sup>91</sup> (HRC release 1) panel using the Michigan  
692 Imputation Server<sup>92</sup>. We used the top 1000 BDR-associated SNPs to examine the  
693 relationship between array-based and WGS-based association  $p$ -values, genotype  
694 discordance and imputation  $r^2$ . Correlation between the array-based and WGS-based

695 association  $p$ -values was determined by Spearman correlation. We also performed  
696 single locus BDR association testing and trans-ethnic meta-analysis by applying  
697 linear regression on 1,122 Puerto Ricans, 662 Mexicans and 1,105 African Americans  
698 using BDR ( $\Delta FEV_1$ ) as a continuous trait. HRC imputed array-based data and the same  
699 covariates as described above were used for the analysis.

#### 700 **Replication of top BDR-associated common variants**

701 Replication cohorts included the Genetics of Asthma in Latino Americans Study  
702 (GALA I), the Study of African Americans, Asthma, Genes & Environments (SAGE I), a  
703 case-control study of childhood asthma in Puerto Ricans (HPR)<sup>93</sup>, the Study of Asthma  
704 Phenotypes and Pharmacogenomic Interactions by Race-Ethnicity (SAPPHIRE)<sup>94</sup> and  
705 the cohort from the Children's Hospital of Philadelphia (CHOP)<sup>95</sup>.

706 Association with BDR was tested by two different approaches. We first treated  
707 BDR as a continuous outcome and used linear regression to assess the effect of each  
708 SNP on BDR. The second approach dichotomized BDR based on the cutoffs observed  
709 in the current study to identify high responders ( $\Delta FEV_1 > 16.29$  for Puerto Ricans,  $>$   
710  $8.55$  for Mexicans and  $> 11.81$  for African Americans) and low responders ( $\Delta FEV_1 <$   
711  $7.23$  for Puerto Ricans,  $< 6.05$  for Mexicans and  $< 5.53$  for African Americans); logistic  
712 regression was used to test the association between high/low responder status and  
713 each SNP. In both analyses, an additive genetic model was assumed for each SNP  
714 tested. SNP associations were adjusted for sex, current age, BMI categories, and the  
715 first 10 principal components in both analyses.

716 The sample size for the GALA I and SAGE I replication cohorts included 172 Puerto  
717 Ricans, 253 Mexicans and 191 African Americans with BDR measurements and  
718 complete data for all the covariates (age, sex, BMI categories and the first ten PCs).  
719 Genotype data were phased with SHAPE-IT<sup>96</sup> and imputation was performed with  
720 IMPUTE2<sup>97</sup> using all populations from 1000 Genomes Project Phase 3 as reference<sup>58</sup>.  
721 In the HPR replication cohort, 523 Puerto Ricans subjects were included. Spirometry  
722 data were collected as previously described<sup>98</sup>. Genome-wide genotyping was  
723 performed using the Illumina HumanOmni2.5 BeadChip platform (Illumina Inc., San  
724 Diego, CA) and processed as previously described<sup>99</sup>. Phasing and imputation of HPR  
725 participant genotype data were done as described for GALA I and SAGE I. In the  
726 SAPPHIRE replication cohort, 1,325 African American subjects with asthma were  
727 included. Genome-wide genotyping was performed using the Axiom<sup>®</sup> Genome-Wide  
728 AFR 1 array (Affymetrix Inc., Santa Clara, CA) as previously described<sup>26</sup>. Genotype  
729 data were imputed to the cosmopolitan 1000 Genomes Phase 1 version haplotypes  
730 using the Michigan Imputation server. The CHOP replication cohort included 378  
731 African Americans. Genotyping was performed as described<sup>95</sup>, and genotype data  
732 were imputed to HRC panel using the Sanger Imputation server<sup>91</sup>. Dichotomizing BDR  
733 yielded 18 high and 107 low responding (18/107) Puerto Ricans, 105/97 Mexicans,  
734 and 57/84 African Americans for GALA I and SAGE I, 43/272 Puerto Ricans for HPR,  
735 465/577 African Americans for SAPPHIRE, and 155/120 African Americans for  
736 CHOP.

737 **Identification of nearest genes to BDR-associated loci**

738 The four nearest transcripts to BDR-associated loci were identified by using the  
739 “closest” command in BEDTools with the parameters “-d -k 4” and the RefSeq gene  
740 annotations (Feb.2009 [GRCh37/hg19] assembly) downloaded in refFlat format from  
741 the UCSC Table Browser<sup>100</sup>. Genes with multiple transcripts were reported once only.

742 **Primary bronchial smooth muscle cell culture**

743 Cryopreserved primary human bronchial smooth muscle from two donors (from  
744 Lonza catalog number CC-2576, lot number 0000212076 and from ATCC catalog  
745 number PCS-130-011, lot number 62326179) were thawed and expanded in Lonza  
746 Smooth Muscle Growth Media (SmGM; catalogue number CC-3182) on T75 flasks  
747 (E&K Scientific Products, catalog number 658175).

748 **H3K27ac ChIP-seq assay**

749 Once BSMCs reached 80% confluency, BSMCs were serum-starved by replacing  
750 SmGM with smooth muscle basal media (SmBM) for 24 hours. After serum starvation,  
751 BSMCs were grown in SmBM containing 5% FBS for 4 hours, then fixed in 1%  
752 formaldehyde for 10 min and quenched with 0.125 M glycine for 5 minutes. Cells were  
753 removed from the T75 flasks by scraping in cold PBS containing sodium butyrate (20  
754 mM, Diagenode, catalog number C12020010). Chromatin sheering was carrying out  
755 using a Covaris S2 sonicator. Sheared chromatin was used for immunoprecipitation  
756 with antibodies against active chromatin marks (H3K27ac; Abcam, ab4729) using the  
757 Diagenode LowCell# ChIP kit (CAT#C01010072), following the manufacture's

758 protocol. Libraries were prepared using the Rubicon DNA-Seq kit (CAT#R400406)  
759 following the manufacturer's protocol and sequenced on an Illumina HiSeq 4000  
760 instrument using single-end 50-bp reads to a sequencing depth of at least 25 million  
761 reads (submitted under BioProject PRJNA369271). Uniquely mapping raw reads  
762 were aligned using Bowtie<sup>101</sup> with default settings. Peak regions for each individual  
763 were called using MACS2<sup>102, 103</sup> and reproducible peaks identified using the ENCODE  
764 IDR pipeline<sup>104</sup>.

### 765 **Luciferase assays**

766 *NFKB1* candidate enhancer sequences were amplified from human genomic DNA  
767 (Roche) using oligonucleotides designed in Primer3 with 18 and 20 bp overhangs for  
768 forward and reverse primers, respectively, (5'-GGCCTAACTGGCCGGTAC -3' and  
769 5'CGCCGAGGCCAGATCTTGAT -3') complementary to sequences flanking the KpnI  
770 and EcoRV sites in the pGL4.23 Gate A vector (Promega) using Phusion High-Fidelity  
771 PCR kit (NEB, catalog number M0531S). PCR products were then cloned into the  
772 pGL4.23 vector using the Gibson Assembly method (NEB, catalog number E2611S).  
773 Smooth muscle cells were plated at 50-70% confluency in 24-well cell culture plates  
774 (Falcon, catalog number 353047) and grown to 80% confluency in SmGM.  
775 Transfections were carried out by combining polyethyleneimine (PEI) with DNA  
776 vectors at a 1:1 ratio by weight in opti-MEM (Life Technologies, catalog number  
777 31985070). Transfection mixture consisted of 225 ng of enhancer assay vectors and  
778 25ng of pGL4.24 (Renilla transfection efficiency control) with 250 ng of PEI in 50  $\mu$ L

779 of opti-MEM. After 15 minutes, 500  $\mu$ L of SmBM was added to the transfection  
780 mixture and the combination added to cell culture. Cells were incubated for 4 hours  
781 in SmBM plus the transfection mixture, then media was replaced with SmGM for 24  
782 hours. Cells were then washed with PBS and enhancer assay cells were lysed with 100  
783  $\mu$ L of Passive Lysis Buffer (Promega). Reporter activity was measured using the Dual-  
784 Luciferase Reporter Assay System (Promega) and measured on the Glomax 96 well  
785 plate luminometer (Promega).

### 786 **RNA extraction, library preparation and sequencing**

787 Among the African American subjects with WGS data in our study, 39 samples were  
788 selected for RNA-seq based on BDR status and the number of copies of low-BDR  
789 associated alleles at rs28450894. The number of samples in each category is shown  
790 in **Supplementary Table 2**. Peripheral blood samples were collected into PAXgene  
791 Blood RNA tubes (PreAnalytiX, Hombrechtikon, Switzerland). Total RNA of 39  
792 samples was extracted from PAXgene Blood RNA tubes using MagMAX™ for  
793 Stabilized Blood Tubes RNA Isolation Kit (CAT#4451894, Thermo Fisher Scientific,  
794 Waltham, MA, USA) according to manufacturer's protocols. RNA integrity and yield  
795 were assessed using an Agilent 2100 Bioanalyzer (Agilent Technologies, Santa Clara,  
796 CA, USA). Globin depletion was performed using GLOBINclear™ kit (CAT#AM1980,  
797 Thermo Fisher Scientific, Waltham, MA, USA). Library preparation and ribosomal  
798 depletion were performed using KAPA Stranded RNA-Seq Kit with RiboErase  
799 (CAT#KK8483, Kapa Biosystems, Wilmington, MA, USA) according to the



800 manufacturer's protocols. Each sample was uniquely barcoded with NEXTflex™ DNA  
801 Barcodes (CAT#514104, Bioo Scientific®, Austin, TX, USA). Barcoded libraries were  
802 pooled and sequenced on 4 lanes on a HiSeq 4000 sequencing system (Illumina®, San  
803 Diego, CA, USA) with a paired-end read length of 100 bp at the University of California,  
804 San Francisco's Center for Advanced Technology.

### 805 **RNA-seq data processing and analysis**

806 Raw sequencing reads were aligned to the human reference genome (hg19) using  
807 STAR<sup>105</sup> (v2.4.2a). Gene read counts were obtained from uniquely mapped reads  
808 based on Ensembl annotation<sup>106</sup> (v75). Read counts were analyzed for differential  
809 gene expression changes between genotypes, including an interaction term with  
810 genotype and sex (genotype \* sex), with DESeq2<sup>107</sup> using a linear model to account  
811 for covariates of sex, age and library prep batch, and a custom model matrix to correct  
812 for GC content difference between genes. After normalization for sequencing depth  
813 and GC percentage, genes with fewer than an average of five normalized read counts  
814 per sample and fewer than 20 samples with at least one read count were removed.  
815 This filtering process kept 19,592 Ensembl genes for analysis to obtain fold changes  
816 and raw *p*-values for both the genotype and genotype \* sex terms. Genes were then  
817 further filtered to specifically analyze the locus surrounding rs28450894 for  
818 differential gene expression, by only including all genes with a transcriptional start  
819 site within 1Mbp of rs28450894. *P*-values were then corrected using the false  
820 discovery rate method to account for the 13 genes in this locus.

821     **REFERENCES**

- 822     1. Vos, T. *et al.* Years lived with disability (YLDs) for 1160 sequelae of 289 diseases  
823     and injuries 1990-2010: a systematic analysis for the Global Burden of Disease  
824     Study 2010. *Lancet* **380**, 2163-2196 (2012).
- 825     2. Asthma [Internet]. World Health Organization. 2013 Nov [last updated 2013 Nov;  
826     accessed: 2017 Jan 28]. Available from:  
827     <http://www.who.int/mediacentre/factsheets/fs307/en/>.
- 828     3. World Health Organization. **Global surveillance, prevention and control of**  
829     **chronic respiratory diseases: a comprehensive approach.** (2007). Available  
830     from: [http://www.who.int/gard/publications/GARD\\_Manual/en/](http://www.who.int/gard/publications/GARD_Manual/en/).
- 831     4. Oh, S. S., White, M. J., Gignoux, C. R. & Burchard, E. G. Making Precision Medicine  
832     Socially Precise. Take a Deep Breath. *Am. J. Respir. Crit. Care Med.* **193**, 348-350  
833     (2016).
- 834     5. Burchard, E. G. Medical research: Missing patients. *Nature* **513**, 301-302 (2014).
- 835     6. Barr, R. G. *et al.* Pulmonary Disease and Age at Immigration among Hispanics.  
836     Results from the Hispanic Community Health Study/Study of Latinos. *Am. J. Respir.*  
837     *Crit. Care Med.* **193**, 386-395 (2016).
- 838     7. Akinbami, L. Asthma Prevalence, Health Care Use and Mortality: United States,  
839     2003-05 [Internet]. Centers for Disease Control and Prevention. 2010 Apr 6 [last

- 840 updated 2015 Nov 6; accessed: 2017 Jan 29]. Available from:  
841 <http://www.cdc.gov/nchs/data/hestat/asthma03-05/asthma03-05.htm>.
- 842 8. Palmer, L. J., Silverman, E. S., Weiss, S. T. & Drazen, J. M. Pharmacogenetics of  
843 asthma. *Am. J. Respir. Crit. Care Med.* **165**, 861-866 (2002).
- 844 9. Nelson, H. S. Beta-adrenergic bronchodilators. *N. Engl. J. Med.* **333**, 499-506  
845 (1995).
- 846 10. Eggleston, P. A. *et al.* Medications used by children with asthma living in the  
847 inner city. *Pediatrics* **101**, 349-354 (1998).
- 848 11. Finkelstein, J. A., Lozano, P., Farber, H. J., Miroshnik, I. & Lieu, T. A. Underuse of  
849 controller medications among Medicaid-insured children with asthma. *Arch. Pediatr.*  
850 *Adolesc. Med.* **156**, 562-567 (2002).
- 851 12. Drazen, J. M., Silverman, E. K. & Lee, T. H. Heterogeneity of therapeutic responses  
852 in asthma. *Br. Med. Bull.* **56**, 1054-1070 (2000).
- 853 13. Burchard, E. G. *et al.* Lower bronchodilator responsiveness in Puerto Rican than  
854 in Mexican subjects with asthma. *Am. J. Respir. Crit. Care Med.* **169**, 386-392 (2004).
- 855 14. Naqvi, M. *et al.* Ethnic-specific differences in bronchodilator responsiveness  
856 among African Americans, Puerto Ricans, and Mexicans with asthma. *J. Asthma* **44**,  
857 639-648 (2007).

- 858 15. Wechsler, M. E. *et al.* Impact of race on asthma treatment failures in the asthma  
859 clinical research network. *Am. J. Respir. Crit. Care Med.* **184**, 1247-1253 (2011).
- 860 16. Martinez, F. D. Safety of long-acting beta-agonists--an urgent need to clear the  
861 air. *N. Engl. J. Med.* **353**, 2637-2639 (2005).
- 862 17. Dixon, A. E. Long-acting beta-agonists and asthma: the saga continues. *Am. J.*  
863 *Respir. Crit. Care Med.* **184**, 1220-1221 (2011).
- 864 18. Nelson, H. S. *et al.* The Salmeterol Multicenter Asthma Research Trial: a  
865 comparison of usual pharmacotherapy for asthma or usual pharmacotherapy plus  
866 salmeterol. *Chest* **129**, 15-26 (2006).
- 867 19. Kramer, J. M. Balancing the benefits and risks of inhaled long-acting beta-  
868 agonists--the influence of values. *N. Engl. J. Med.* **360**, 1592-1595 (2009).
- 869 20. McGeachie, M. J. *et al.* Polygenic heritability estimates in pharmacogenetics:  
870 focus on asthma and related phenotypes. *Pharmacogenet Genomics* **23**, 324-328  
871 (2013).
- 872 21. Nieminen, M. M., Kaprio, J. & Koskenvuo, M. A population-based study of  
873 bronchial asthma in adult twin pairs. *Chest* **100**, 70-75 (1991).
- 874 22. Fagnani, C. *et al.* Heritability and shared genetic effects of asthma and hay fever:  
875 an Italian study of young twins. *Twin Res. Hum. Genet.* **11**, 121-131 (2008).

- 876 23. Himes, B. E. *et al.* Genome-wide association analysis in asthma subjects identifies  
877 SPATS2L as a novel bronchodilator response gene. *PLoS Genet.* **8**, e1002824 (2012).
- 878 24. Duan, Q. L. *et al.* A genome-wide association study of bronchodilator response in  
879 asthmatics. *Pharmacogenomics J.* **14**, 41-47 (2014).
- 880 25. Israel, E. *et al.* Genome-wide association study of short-acting beta2-agonists. A  
881 novel genome-wide significant locus on chromosome 2 near ASB3. *Am. J. Respir. Crit.*  
882 *Care Med.* **191**, 530-537 (2015).
- 883 26. Padhukasahasram, B. *et al.* Gene-based association identifies SPATA13-AS1 as a  
884 pharmacogenomic predictor of inhaled short-acting beta-agonist response in  
885 multiple population groups. *Pharmacogenomics J.* **14**, 365-371 (2014).
- 886 27. Drake, K. A. *et al.* A genome-wide association study of bronchodilator response  
887 in Latinos implicates rare variants. *J. Allergy Clin. Immunol.* **133**, 370-378 (2014).
- 888 28. Conrad, D. F. *et al.* A worldwide survey of haplotype variation and linkage  
889 disequilibrium in the human genome. *Nat. Genet.* **38**, 1251-1260 (2006).
- 890 29. Hoffmann, T. J. *et al.* Design and coverage of high throughput genotyping arrays  
891 optimized for individuals of East Asian, African American, and Latino race/ethnicity  
892 using imputation and a novel hybrid SNP selection algorithm. *Genomics* **98**, 422-430  
893 (2011).

- 894 30. Zheng, H. F. *et al.* Performance of genotype imputation for low frequency and  
895 rare variants from the 1000 genomes. *PLoS One* **10**, e0116487 (2015).
- 896 31. Huang, J. *et al.* Improved imputation of low-frequency and rare variants using  
897 the UK10K haplotype reference panel. *Nat. Commun.* **6**, 8111 (2015).
- 898 32. Zhang, F. & Lupski, J. R. Non-coding genetic variants in human disease. *Hum. Mol.*  
899 *Genet.* **24**, R102-10 (2015).
- 900 33. Bustamante, C. D., Burchard, E. G. & De la Vega, F. M. Genomics for the world.  
901 *Nature* **475**, 163-165 (2011).
- 902 34. Popejoy, A. B. & Fullerton, S. M. Genomics is failing on diversity. *Nature* **538**,  
903 161-164 (2016).
- 904 35. Oh, S. S. *et al.* Diversity in Clinical and Biomedical Research: A Promise Yet to Be  
905 Fulfilled. *PLoS Med.* **12**, e1001918 (2015).
- 906 36. Hankinson, J. L., Odencrantz, J. R. & Fedan, K. B. Spirometric reference values  
907 from a sample of the general U.S. population. *Am. J. Respir. Crit. Care Med.* **159**, 179-  
908 187 (1999).
- 909 37. Kircher, M. *et al.* A general framework for estimating the relative pathogenicity  
910 of human genetic variants. *Nat. Genet.* **46**, 310-315 (2014).

- 911 38. Gulko, B., Hubisz, M. J., Gronau, I. & Siepel, A. A method for calculating  
912 probabilities of fitness consequences for point mutations across the human genome.  
913 *Nat. Genet.* **47**, 276-283 (2015).
- 914 39. Sobota, R. S. *et al.* Addressing population-specific multiple testing burdens in  
915 genetic association studies. *Ann. Hum. Genet.* **79**, 136-147 (2015).
- 916 40. Zaykin, D. V. & Zhivotovsky, L. A. Ranks of genuine associations in whole-genome  
917 scans. *Genetics* **171**, 813-823 (2005).
- 918 41. Lee, S., Wu, M. C. & Lin, X. Optimal tests for rare variant effects in sequencing  
919 association studies. *Biostatistics* **13**, 762-775 (2012).
- 920 42. Lee, J. H. *et al.* DNAH5 is associated with total lung capacity in chronic  
921 obstructive pulmonary disease. *Respir. Res.* **15**, 97-014-0097-y (2014).
- 922 43. Ortiz, R. A. & Barnes, K. C. Genetics of allergic diseases. *Immunol. Allergy Clin.*  
923 *North. Am.* **35**, 19-44 (2015).
- 924 44. Ramasamy, A. *et al.* A genome-wide meta-analysis of genetic variants associated  
925 with allergic rhinitis and grass sensitization and their interaction with birth order. *J.*  
926 *Allergy Clin. Immunol.* **128**, 996-1005 (2011).
- 927 45. Naqvi, M. *et al.* Association between IgE levels and asthma severity among  
928 African American, Mexican, and Puerto Rican patients with asthma. *J. Allergy Clin.*  
929 *Immunol.* **120**, 137-143 (2007).

- 930 46. Edwards, M. R. *et al.* Targeting the NF-kappaB pathway in asthma and chronic  
931 obstructive pulmonary disease. *Pharmacol. Ther.* **121**, 1-13 (2009).
- 932 47. Zhen, G. *et al.* IL-13 and epidermal growth factor receptor have critical but  
933 distinct roles in epithelial cell mucin production. *Am. J. Respir. Cell Mol. Biol.* **36**, 244-  
934 253 (2007).
- 935 48. Murgia, C. *et al.* Apical localization of zinc transporter ZnT4 in human airway  
936 epithelial cells and its loss in a murine model of allergic airway inflammation.  
937 *Nutrients* **3**, 910-928 (2011).
- 938 49. Besecker, B. *et al.* The human zinc transporter SLC39A8 (Zip8) is critical in zinc-  
939 mediated cytoprotection in lung epithelia. *Am. J. Physiol. Lung Cell. Mol. Physiol.* **294**,  
940 L1127-36 (2008).
- 941 50. Persson, H. *et al.* Transcriptome analysis of controlled and therapy-resistant  
942 childhood asthma reveals distinct gene expression profiles. *J. Allergy Clin. Immunol.*  
943 **136**, 638-648 (2015).
- 944 51. Lin, Y. J. *et al.* Genetic variants in PLCB4/PLCB1 as susceptibility loci for  
945 coronary artery aneurysm formation in Kawasaki disease in Han Chinese in Taiwan.  
946 *Sci. Rep.* **5**, 14762 (2015).
- 947 52. Hersch, M. *et al.* Mapping genetic variants associated with beta-adrenergic  
948 responses in inbred mice. *PLoS One* **7**, e41032 (2012).



- 949 53. Dougherty, R. H. *et al.* Accumulation of intraepithelial mast cells with a unique  
950 protease phenotype in T(H)2-high asthma. *J. Allergy Clin. Immunol.* **125**, 1046-  
951 1053.e8 (2010).
- 952 54. Woodruff, P. G. *et al.* Genome-wide profiling identifies epithelial cell genes  
953 associated with asthma and with treatment response to corticosteroids. *Proc. Natl.*  
954 *Acad. Sci. U. S. A.* **104**, 15858-15863 (2007).
- 955 55. Motsinger-Reif, A. A. *et al.* Genome-wide association studies in  
956 pharmacogenomics: successes and lessons. *Pharmacogenet Genomics* **23**, 383-394  
957 (2013).
- 958 56. Peloso, G. M. *et al.* Phenotypic extremes in rare variant study designs. *Eur. J. Hum.*  
959 *Genet.* **24**, 924-930 (2016).
- 960 57. Tishkoff, S. A. *et al.* The genetic structure and history of Africans and African  
961 Americans. *Science* **324**, 1035-1044 (2009).
- 962 58. 1000 Genomes Project Consortium *et al.* A global reference for human genetic  
963 variation. *Nature* **526**, 68-74 (2015).
- 964 59. Zou, J. Y. *et al.* Genetic and socioeconomic study of mate choice in Latinos reveals  
965 novel assortment patterns. *Proc. Natl. Acad. Sci. U. S. A.* **112**, 13621-13626 (2015).
- 966 60. Hall, S. S. Genetics: a gene of rare effect. *Nature* **496**, 152-155 (2013).

- 967 61. Burchard, E. G., Oh, S. S., Foreman, M. G. & Celedon, J. C. Moving toward true  
968 inclusion of racial/ethnic minorities in federally funded studies. A key step for  
969 achieving respiratory health equality in the United States. *Am. J. Respir. Crit. Care*  
970 *Med.* **191**, 514-521 (2015).
- 971 62. Borrell, L. N. *et al.* Childhood obesity and asthma control in the GALA II and SAGE  
972 II studies. *Am. J. Respir. Crit. Care Med.* **187**, 697-702 (2013).
- 973 63. Nishimura, K. K. *et al.* Early-life air pollution and asthma risk in minority  
974 children. The GALA II and SAGE II studies. *Am. J. Respir. Crit. Care Med.* **188**, 309-318  
975 (2013).
- 976 64. Thakur, N. *et al.* Socioeconomic status and childhood asthma in urban minority  
977 youths. The GALA II and SAGE II studies. *Am. J. Respir. Crit. Care Med.* **188**, 1202-  
978 1209 (2013).
- 979 65. White, M. J. *et al.* Novel genetic risk factors for asthma in African American  
980 children: Precision Medicine and the SAGE II Study. *Immunogenetics* **68**, 391-400  
981 (2016).
- 982 66. Jun, G. *et al.* Detecting and estimating contamination of human DNA samples in  
983 sequencing and array-based genotype data. *Am. J. Hum. Genet.* **91**, 839-848 (2012).
- 984 67. Li, H. & Durbin, R. Fast and accurate short read alignment with Burrows-Wheeler  
985 transform. *Bioinformatics* **25**, 1754-1760 (2009).

- 986 68. DePristo, M. A. *et al.* A framework for variation discovery and genotyping using  
987 next-generation DNA sequencing data. *Nat. Genet.* **43**, 491-498 (2011).
- 988 69. Danecek, P. *et al.* The variant call format and VCFtools. *Bioinformatics* **27**, 2156-  
989 2158 (2011).
- 990 70. Li, H. Toward better understanding of artifacts in variant calling from high-  
991 coverage samples. *Bioinformatics* **30**, 2843-2851 (2014).
- 992 71. Chang, C. C. *et al.* Second-generation PLINK: rising to the challenge of larger and  
993 richer datasets. *Gigascience* **4**, 7-015-0047-8. eCollection 2015 (2015).
- 994 72. Best practice for converting VCF files to plink format [Internet]. Genetics For  
995 Fun. 2014 Nov 25 [last updated 2014 Nov 25; accessed: 2015 Oct 1]. Available from:  
996 <http://apol1.blogspot.nl/2014/11/best-practice-for-converting-vcf-files.html>.
- 997 73. Thornton, T. *et al.* Estimating kinship in admixed populations. *Am. J. Hum. Genet.*  
998 **91**, 122-138 (2012).
- 999 74. Alexander, D. H., Novembre, J. & Lange, K. Fast model-based estimation of  
1000 ancestry in unrelated individuals. *Genome Res.* **19**, 1655-1664 (2009).
- 1001 75. Manichaikul, A. *et al.* Robust relationship inference in genome-wide association  
1002 studies. *Bioinformatics* **26**, 2867-2873 (2010).

- 1003 76. Price, A. L. *et al.* Principal components analysis corrects for stratification in  
1004 genome-wide association studies. *Nat. Genet.* **38**, 904-909 (2006).
- 1005 77. Delaneau, O., Zagury, J. F. & Marchini, J. Improved whole-chromosome phasing  
1006 for disease and population genetic studies. *Nat. Methods* **10**, 5-6 (2013).
- 1007 78. Maples, B. K., Gravel, S., Kenny, E. E. & Bustamante, C. D. RFMix: a discriminative  
1008 modeling approach for rapid and robust local-ancestry inference. *Am. J. Hum. Genet.*  
1009 **93**, 278-288 (2013).
- 1010 79. Liu, X. *et al.* WGS: an annotation pipeline for human genome sequencing  
1011 studies. *J. Med. Genet.* **53**, 111-112 (2016).
- 1012 80. Yao, T. C. *et al.* Associations of age, gender, and BMI with prevalence of allergic  
1013 diseases in children: PATCH study. *J. Asthma* **48**, 503-510 (2011).
- 1014 81. Nicolai, T., Pereszlenyiova-Bliznakova, L., Illi, S., Reinhardt, D. & von Mutius, E.  
1015 Longitudinal follow-up of the changing gender ratio in asthma from childhood to  
1016 adulthood: role of delayed manifestation in girls. *Pediatr. Allergy Immunol.* **14**, 280-  
1017 283 (2003).
- 1018 82. Joseph, M. *et al.* Racial disparity in the association between body mass index and  
1019 self-reported asthma in children: a population-based study. *J. Asthma* **53**, 492-497  
1020 (2016).

- 1021 83. Dixon, A. E. *et al.* Effect of obesity on clinical presentation and response to  
1022 treatment in asthma. *J. Asthma* **43**, 553-558 (2006).
- 1023 84. Ullah, M. I., Newman, G. B. & Saunders, K. B. Influence of age on response to  
1024 ipratropium and salbutamol in asthma. *Thorax* **36**, 523-529 (1981).
- 1025 85. Mohamed, M. H., Lima, J. J., Eberle, L. V., Self, T. H. & Johnson, J. A. Effects of  
1026 gender and race on albuterol pharmacokinetics. *Pharmacotherapy* **19**, 157-161  
1027 (1999).
- 1028 86. Carroll, C. L., Bhandari, A., Zucker, A. R. & Schramm, C. M. Childhood obesity  
1029 increases duration of therapy during severe asthma exacerbations. *Pediatr. Crit.*  
1030 *Care. Med.* **7**, 527-531 (2006).
- 1031 87. Forno, E. *et al.* Decreased response to inhaled steroids in overweight and obese  
1032 asthmatic children. *J. Allergy Clin. Immunol.* **127**, 741-749 (2011).
- 1033 88. Duggal, P., Gillanders, E. M., Holmes, T. N. & Bailey-Wilson, J. E. Establishing an  
1034 adjusted p-value threshold to control the family-wide type 1 error in genome wide  
1035 association studies. *BMC Genomics* **9**, 516-2164-9-516 (2008).
- 1036 89. Pruim, R. J. *et al.* LocusZoom: regional visualization of genome-wide association  
1037 scan results. *Bioinformatics* **26**, 2336-2337 (2010).

- 1038 90. Han, B. & Eskin, E. Random-effects model aimed at discovering associations in  
1039 meta-analysis of genome-wide association studies. *Am. J. Hum. Genet.* **88**, 586-598  
1040 (2011).
- 1041 91. McCarthy, S. *et al.* A reference panel of 64,976 haplotypes for genotype  
1042 imputation. *Nat. Genet.* **48**, 1279-1283 (2016).
- 1043 92. Das, S. *et al.* Next-generation genotype imputation service and methods. *Nat.*  
1044 *Genet.* **48**, 1284-1287 (2016).
- 1045 93. Han, Y. Y. *et al.* Diet, interleukin-17, and childhood asthma in Puerto Ricans. *Ann.*  
1046 *Allergy Asthma Immunol.* **115**, 288-293.e1 (2015).
- 1047 94. Levin, A. M. *et al.* Nocturnal asthma and the importance of race/ethnicity and  
1048 genetic ancestry. *Am. J. Respir. Crit. Care Med.* **190**, 266-273 (2014).
- 1049 95. Ong, B. A. *et al.* Gene network analysis in a pediatric cohort identifies novel lung  
1050 function genes. *PLoS One* **8**, e72899 (2013).
- 1051 96. Delaneau, O., Marchini, J. & Zagury, J. F. A linear complexity phasing method for  
1052 thousands of genomes. *Nat. Methods* **9**, 179-181 (2011).
- 1053 97. Howie, B. N., Donnelly, P. & Marchini, J. A flexible and accurate genotype  
1054 imputation method for the next generation of genome-wide association studies.  
1055 *PLoS Genet.* **5**, e1000529 (2009).

- 1056 98. Miller, M. R. *et al.* Standardisation of lung function testing: the authors' replies to  
1057 readers' comments. *Eur. Respir. J.* **36**, 1496-1498 (2010).
- 1058 99. Chen, W. *et al.* Expression quantitative trait loci (eQTL) mapping in Puerto Rican  
1059 children. *PLoS One* **10**, e0122464 (2015).
- 1060 100. Karolchik, D. *et al.* The UCSC Table Browser data retrieval tool. *Nucleic Acids*  
1061 *Res.* **32**, D493-6 (2004).
- 1062 101. Langmead, B., Trapnell, C., Pop, M. & Salzberg, S. L. Ultrafast and memory-  
1063 efficient alignment of short DNA sequences to the human genome. *Genome Biol.* **10**,  
1064 R25-2009-10-3-r25. Epub 2009 Mar 4 (2009).
- 1065 102. Zhang, Y. *et al.* Model-based analysis of ChIP-Seq (MACS). *Genome Biol.* **9**, R137-  
1066 2008-9-9-r137. Epub 2008 Sep 17 (2008).
- 1067 103. Feng, J., Liu, T., Qin, B., Zhang, Y. & Liu, X. S. Identifying ChIP-seq enrichment  
1068 using MACS. *Nat. Protoc.* **7**, 1728-1740 (2012).
- 1069 104. Landt, S. G. *et al.* ChIP-seq guidelines and practices of the ENCODE and  
1070 modENCODE consortia. *Genome Res.* **22**, 1813-1831 (2012).
- 1071 105. Dobin, A. *et al.* STAR: ultrafast universal RNA-seq aligner. *Bioinformatics* **29**,  
1072 15-21 (2013).
- 1073 106. Flicek, P. *et al.* Ensembl 2014. *Nucleic Acids Res.* **42**, D749-55 (2014).

- 1074 107. Love, M. I., Huber, W. & Anders, S. Moderated estimation of fold change and  
1075 dispersion for RNA-seq data with DESeq2. *Genome Biol.* **15**, 550 (2014).



## FIGURE LEGENDS

**Figure 1.** (a) Number of variants per sample. The bin size is 0.025M variants. (b) Allele frequency of biallelic SNPs (relative to hg19). (c) Allele frequency of population-specific biallelic SNPs. (d) Novel biallelic SNPs based on dbSNP build147.

**Figure 2.** (a) Manhattan plot of the trans-ethnic meta-analysis of single locus BDR association testing. The top ten BDR-associated loci are circled. SNPs with high LD ( $r^2 > 0.8$ ) are considered as a single locus. The horizontal lines are colored black for universal genome-wide significance threshold ( $5.00 \times 10^{-8}$ ), red for adjusted genome-wide significance threshold ( $3.53 \times 10^{-7}$ ) and blue for suggestive significance threshold ( $7.06 \times 10^{-6}$ ). (b) Forest plot of the population-specific and joint effect of the top BDR-associated SNP, rs17834628. The direction of effect is the same in all three populations. (c) The top BDR-associated SNP (rs17834628) is plotted together with 400kb flanking regions on either side. Multiple SNPs in high LD ( $r^2 > 0.8$ , red) reached a suggestive significance level.

**Figure 3.** Manhattan plot of SKAT-O analysis of biallelic common and rare SNPs grouped by 1kb windows sliding across chromosome 1 to 22 in (a) Puerto Ricans (b) African Americans, (c) Mexicans, and (d) all populations combined. Bonferroni-corrected genome-wide and suggestive significance levels are marked by red and blue lines, respectively.

Figure 1

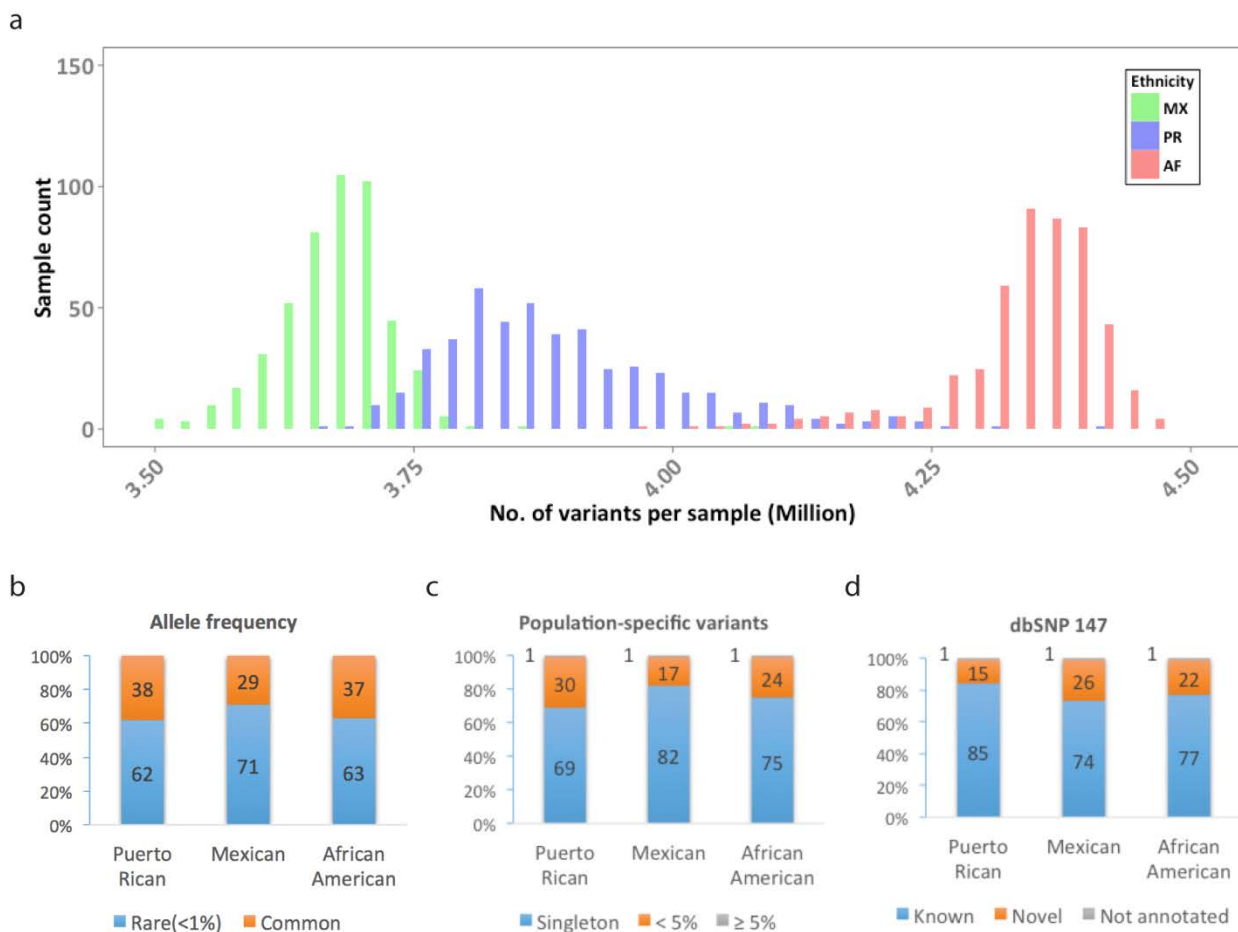

Figure 2

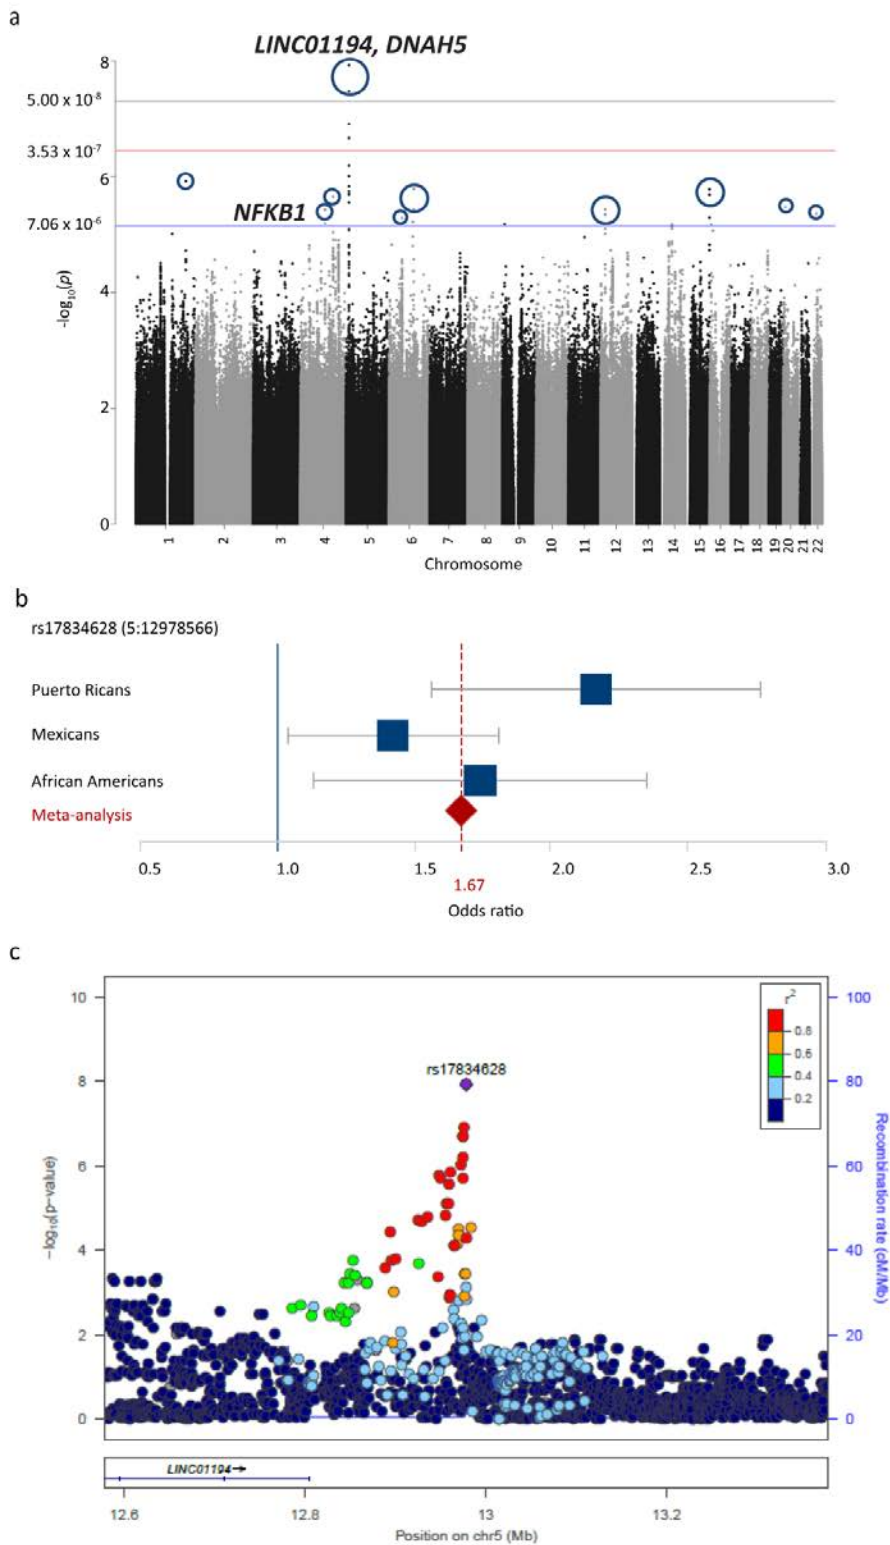

Figure 3

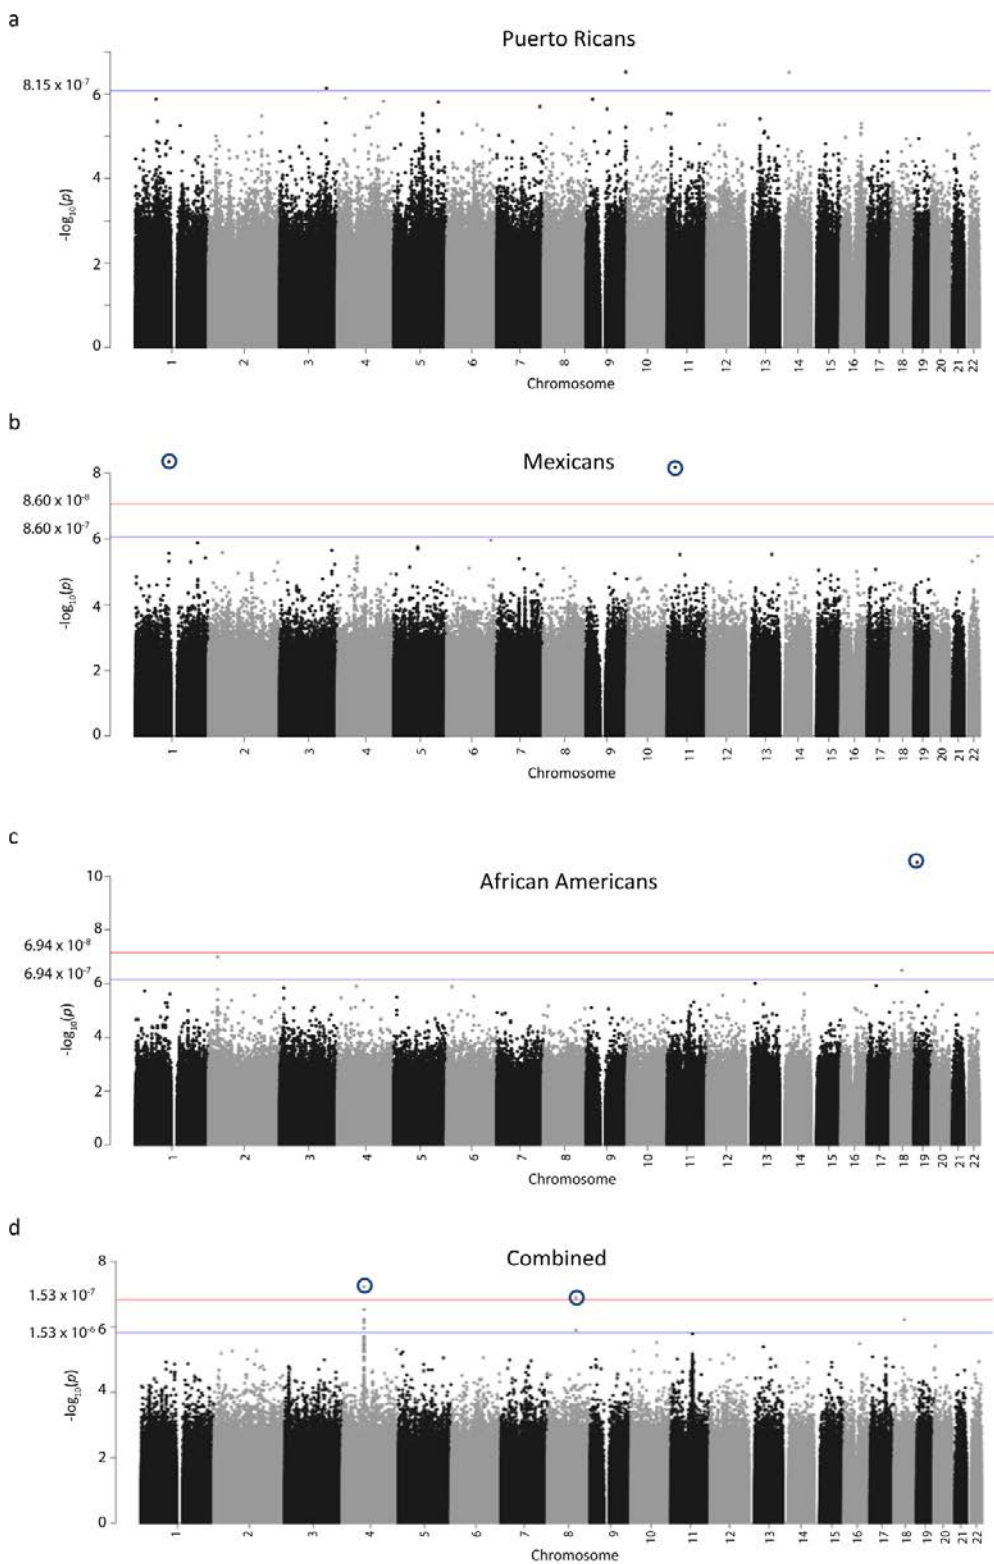

Table 1. Study Population Description (N=1,441).

| Descriptive Statistics              |           | Puerto Ricans (n=483) |                       |          | Mexicans (n=483)      |                       |          | African Americans (n=475) |                       |          |
|-------------------------------------|-----------|-----------------------|-----------------------|----------|-----------------------|-----------------------|----------|---------------------------|-----------------------|----------|
|                                     |           | High BDR              | Low BDR               | <i>P</i> | High BDR              | Low BDR               | <i>P</i> | High BDR                  | Low BDR               | <i>P</i> |
| Number of Subjects                  |           | 239                   | 244                   | -        | 243                   | 240                   | -        | 233                       | 242                   | -        |
| Percent Male                        |           | 53.6%                 | 53.3%                 | 1.0      | 60.1%                 | 52.1%                 | 0.08     | 55.4%                     | 47.9%                 | 0.12     |
| Median Age, yr (IQR)                |           | 11.6<br>(9.7 - 14.8)  | 12.2<br>(10.1 - 15.2) | 0.18     | 11.7<br>(9.6 - 14.0)  | 13.3<br>(10.6 - 16.0) | <0.001   | 13.8<br>(11.0 - 16.8)     | 13.8<br>(10.9 - 17.1) | 0.48     |
| Mean Global Ancestry Proportions    | AFR       | 0.24                  | 0.22                  | 0.44     | 0.05                  | 0.05                  | 0.37     | 0.79                      | 0.79                  | 0.80     |
|                                     | EUR       | 0.63                  | 0.64                  | 0.27     | 0.37                  | 0.36                  | 0.84     | 0.19                      | 0.20                  | 0.70     |
|                                     | NAM       | 0.13                  | 0.13                  | 0.93     | 0.58                  | 0.59                  | 0.90     | 0.02                      | 0.02                  | 0.90     |
| BMI Category, N                     | Obese     | 76                    | 67                    | 0.32     | 100                   | 96                    | 0.85     | 82                        | 83                    | 0.85     |
|                                     | Non-Obese | 163                   | 177                   |          | 143                   | 144                   |          | 151                       | 159                   |          |
| Pre-FEV <sub>1</sub> % Predicted, N | < 80%     | 149                   | 56                    | <0.001   | 43                    | 7                     | <0.001   | 47                        | 6                     | <0.001   |
|                                     | ≥ 80%     | 90                    | 188                   |          | 200                   | 233                   |          | 186                       | 236                   |          |
| Median ΔFEV <sub>1</sub> , % (IQR)  |           | 21.2<br>(18.2 - 25.7) | 5.0<br>(2.9 - 6.3)    | -        | 12.7<br>(10.3 - 16.8) | 3.6<br>(2.0 - 4.9)    | -        | 15.5<br>(13.3 - 20.3)     | 3.3<br>(2.0 - 4.4)    | -        |

BDR: bronchodilator drug response. IQR: interquartile range. Pre-FEV<sub>1</sub> % predicted: percentage of measured FEV<sub>1</sub> relative to predicted FEV<sub>1</sub> estimated by the Hankinson lung function prediction equations<sup>36</sup>, prior to administration to albuterol. ΔFEV<sub>1</sub>: a quantitative measure of BDR, measured as the percent change in baseline FEV<sub>1</sub> after administration of albuterol. High and low drug responders were chosen from the extremes of the BDR (ΔFEV<sub>1</sub>) distribution.

Table 2. Summary statistics of variants

|                                                 | Puerto Ricans                  | Mexicans                       | African Americans              |
|-------------------------------------------------|--------------------------------|--------------------------------|--------------------------------|
| <b>Range in variants, per individual (mean)</b> |                                |                                |                                |
| <b>All</b>                                      | 3.7M – 4.4 M<br>(4.0 M)        | 3.5M – 4.1M<br>(3.7M)          | 4.0M – 4.5M<br>(4.3M)          |
| SNPs                                            | 3.4M – 4.0 M<br>(3.6M)         | 3.2M - 3.7M<br>(3.4M)          | 3.6M – 4.1M<br>(4.0M)          |
| Indels                                          | 284,067 – 344,493<br>(305,618) | 272,635 – 321,778<br>(289,096) | 311,997 – 354,646<br>(339,570) |
| Others*                                         | 21,233 – 29,177<br>(24,728)    | 19,703 – 26,772<br>(23,190)    | 22,014 – 30,993<br>(27,911)    |
| <b>No. of biallelic SNPs, union**</b>           | 29.2M                          | 28.1M                          | 36.3M                          |
| <b>By allele frequency of data</b>              |                                |                                |                                |
| Rare (< 1%)                                     | 18,169,292 (62%)               | 20,029,291 (71%)               | 22,847,938 (63%)               |
| Common (≥ 1%)                                   | 11,007,125 (38%)               | 8,092,157 (29%)                | 13,459,004 (37%)               |
| <b>Population-specific***</b>                   |                                |                                |                                |
| Singleton                                       | 4,616,383 (69%)                | 7,983,950 (82%)                | 10,574,879 (75%)               |
| < 5%                                            | 6,676,286 (> 99%)              | 9,675,271 (> 99%)              | 14,096,844 (> 99%)             |
| ≥ 5%                                            | 4,623 (< 1%)                   | 12,380 (< 1%)                  | 17,298 (< 1%)                  |
| <b>By novelty (dbSNP147)</b>                    |                                |                                |                                |
| Known                                           | 24,654,288 (85%)               | 20,673,589 (74%)               | 28,122,310 (77%)               |
| Novel                                           | 4,463,442 (15%)                | 7,384,900 (26%)                | 8,119,236 (22%)                |
| Not annotated <sup>^</sup>                      | 58,687 (< 1%)                  | 62,959 (< 1%)                  | 65,396 (< 1%)                  |
| <b>By protein impact****</b>                    |                                |                                |                                |
| Coding                                          | 284,269 (1%)                   | 289,055 (1%)                   | 362,823 (1%)                   |
| <i>Nonsynonymous</i>                            | 157,541                        | 164,312                        | 203,029                        |
| <i>Stopgain / stoploss</i>                      | 3,194                          | 3,531                          | 4,158                          |
| <i>Splicing</i>                                 | 2,111                          | 2,214                          | 2,620                          |
| <i>Other coding</i>                             | 121,423                        | 118,998                        | 153,016                        |
| Noncoding                                       | 28,833,461 (99%)               | 27,769,434 (99%)               | 35,878,723 (99%)               |
| Not annotated <sup>^</sup>                      | 58,687 (< 1%)                  | 62,959 (< 1%)                  | 65,396 (< 1%)                  |

\* Includes multi-nucleotide polymorphism (MNPs), complex, symbolic and mixed variants as defined by GATK VariantEval.

\*\* Biallelic SNPs with less than 10% genotype missingness per population were included.

\*\*\* Biallelic SNPs that are present in only one of the three studied populations.

\*\*\*\* Other coding variants include those annotated as exonic and synonymous in ANNOVAR.

<sup>^</sup> **Not annotated:** biallelic SNPs not included in the annotation pipeline because they are not present in TOPMed freeze 2 and 3 data releases.

Table 3. CADD score summary statistics of biallelic SNPs\*.

| <b>Population</b> | <b>CADD score</b> | <b>No. of SNPs*</b> | <b>% Coding</b> | <b>% Singletons</b> |
|-------------------|-------------------|---------------------|-----------------|---------------------|
| Puerto Ricans     | 0-9               | 26,936,285          | 0.5%            | 29%                 |
|                   | 10-19             | 2,027,392           | 4%              | 32%                 |
|                   | 20-24             | 123,481             | 32%             | 37%                 |
|                   | ≥ 25              | 30,572              | >99%            | 51%                 |
| Mexicans          | 0-9               | 25,932,006          | 0.5%            | 44%                 |
|                   | 10-19             | 1,967,096           | 4%              | 49%                 |
|                   | 20-24             | 124,173             | 34%             | 55%                 |
|                   | ≥ 25              | 35,214              | >99%            | 70%                 |
| African Americans | 0-9               | 33,468,245          | 0.5%            | 36%                 |
|                   | 10-19             | 2,573,523           | 4%              | 40%                 |
|                   | 20-24             | 158,967             | 32%             | 46%                 |
|                   | ≥ 25              | 40,811              | >99%            | 64%                 |

\*Biallelic SNPs with less than 10% genotype missingness per population were included.

Table 4. Results from trans-ethnic BDR association tests for common variants

| Chr | Start     | LD SNP | rsID       | Effect allele | OR (95%CI)       | p        | Effect allele frequency |      |      | Nearest genes                                                                              |
|-----|-----------|--------|------------|---------------|------------------|----------|-------------------------|------|------|--------------------------------------------------------------------------------------------|
|     |           |        |            |               |                  |          | PR                      | MX   | AA   |                                                                                            |
| 5   | 12978566  | *      | rs17834628 | A             | 1.67 (1.29-2.16) | 1.18E-08 | 0.32                    | 0.42 | 0.17 | <i>LINC01194</i> (173k), <i>MIR4454</i> (311k), <i>CTNND2</i> (1074k); <i>DNAH5</i> (712k) |
| 5   | 12968341  |        | rs35661809 | G             | 1.59 (1.20-2.10) | 3.33E-08 | 0.34                    | 0.43 | 0.24 | <i>LINC01194</i> (163k), <i>MIR4454</i> (300k), <i>CTNND2</i> (1064k); <i>DNAH5</i> (722k) |
| 5   | 12975934  |        | rs17237639 | G             | 1.61 (1.30-2.00) | 1.22E-07 | 0.31                    | 0.43 | 0.16 | <i>LINC01194</i> (171k), <i>MIR4454</i> (308k), <i>CTNND2</i> (1072k); <i>DNAH5</i> (715k) |
| 5   | 12975187  |        | rs1017452  | G             | 1.60 (1.31-1.96) | 2.11E-07 | 0.31                    | 0.43 | 0.16 | <i>LINC01194</i> (170k), <i>MIR4454</i> (307k), <i>CTNND2</i> (1071k); <i>DNAH5</i> (715k) |
| 5   | 12975322  |        | rs1017454  | A             | 1.60 (1.31-1.96) | 2.11E-07 | 0.31                    | 0.43 | 0.16 | <i>LINC01194</i> (170k), <i>MIR4454</i> (307k), <i>CTNND2</i> (1071k); <i>DNAH5</i> (715k) |
| 5   | 12975265  |        | rs1017453  | C             | 1.56 (1.25-1.95) | 6.40E-07 | 0.31                    | 0.42 | 0.16 | <i>LINC01194</i> (170k), <i>MIR4454</i> (307k), <i>CTNND2</i> (1071k); <i>DNAH5</i> (715k) |
| 5   | 12972636  |        | rs17237443 | C             | 1.59 (1.28-1.97) | 9.85E-07 | 0.29                    | 0.42 | 0.11 | <i>LINC01194</i> (170k), <i>MIR4454</i> (307k), <i>CTNND2</i> (1071k); <i>DNAH5</i> (715k) |
| 1   | 209324294 | *      | rs10746419 | T             | 1.29 (0.75-2.25) | 1.19E-06 | 0.49                    | 0.54 | 0.53 | <i>MIR205HG</i> (278k), <i>MIR205</i> (281k), <i>CAMK1G</i> (433k), <i>LAMB3</i> (464k)    |
| 5   | 12961545  |        | rs17833938 | A             | 1.56 (1.28-1.91) | 1.45E-06 | 0.30                    | 0.42 | 0.12 | <i>LINC01194</i> (156k), <i>MIR4454</i> (294k), <i>CTNND2</i> (1057k); <i>DNAH5</i> (729k) |
| 6   | 104240500 | *      | rs13437006 | C             | 1.56 (1.21-2.02) | 1.61E-06 | 0.22                    | 0.24 | 0.32 | <i>HACE1</i> (935k), <i>LINC00577</i> (1144k), <i>LIN28B</i> (1164k)                       |
| 15  | 101230457 | *      | rs1565749  | A             | 1.66 (1.18-2.32) | 1.64E-06 | 0.18                    | 0.15 | 0.18 | <i>ASB7</i> (39k), <i>LINS1</i> (88k), <i>PRKXP1</i> (131k)                                |
| 5   | 12948369  |        | rs34845041 | T             | 1.56 (1.26-1.92) | 1.77E-06 | 0.30                    | 0.42 | 0.12 | <i>LINC01194</i> (143k), <i>MIR4454</i> (280k), <i>CTNND2</i> (1044k); <i>DNAH5</i> (742k) |
| 5   | 12975108  |        | rs1017451  | T             | 1.55 (1.24-1.93) | 1.96E-06 | 0.30                    | 0.42 | 0.13 | <i>LINC01194</i> (170k), <i>MIR4454</i> (307k), <i>CTNND2</i> (1071k); <i>DNAH5</i> (715k) |
| 5   | 12950432  |        | rs62347395 | G             | 1.55 (1.26-1.92) | 2.02E-06 | 0.30                    | 0.42 | 0.12 | <i>LINC01194</i> (145k), <i>MIR4454</i> (282k), <i>CTNND2</i> (1046k); <i>DNAH5</i> (740k) |
| 15  | 101231049 |        | rs57924834 | A             | 1.59 (1.25-2.03) | 2.04E-06 | 0.23                    | 0.20 | 0.20 | <i>ASB7</i> (39k), <i>LINS1</i> (89k), <i>PRKXP1</i> (132k)                                |
| 4   | 137382142 | *      | rs17048684 | A             | 1.8 (1.06-3.05)  | 2.20E-06 | 0.11                    | 0.14 | 0.18 | <i>LINC00613</i> (547k), <i>LINC00613</i> (573k); <i>PCDH18</i> (1058k)                    |
| 5   | 12959598  |        | rs1438293  | G             | 1.55 (1.24-1.93) | 2.73E-06 | 0.29                    | 0.42 | 0.11 | <i>LINC01194</i> (154k), <i>MIR4454</i> (292k), <i>CTNND2</i> (1055k); <i>DNAH5</i> (731k) |
| 20  | 8635168   | *      | rs16995064 | G             | 1.96 (1.12-3.43) | 3.30E-06 | 0.12                    | 0.13 | 0.05 | <b><i>PLCB1</i></b> (intron 7); <i>PLCB4</i> (415k)                                        |
| 12  | 19821401  | *      | rs66544720 | T             | 0.66 (0.55-0.78) | 3.66E-06 | 0.33                    | 0.37 | 0.16 | <i>AEBP2</i> (146k), <i>PLEKHA5</i> (292k)                                                 |
| 6   | 104235591 |        | rs6926020  | C             | 1.57 (1.25-1.97) | 3.68E-06 | 0.19                    | 0.23 | 0.27 | <i>HACE1</i> (940k), <i>LINC00577</i> (1149k), <i>LIN28B</i> (1169k)                       |
| 4   | 103453535 | *      | rs28450894 | T             | 0.47 (0.34-0.64) | 3.75E-06 | 0.06                    | 0.03 | 0.12 | <i>SLC39A8</i> (187k); <b><i>NFKB1</i></b> (intron 3); <i>MANBA</i> (99k)                  |
| 4   | 103461559 |        | rs4648006  | T             | 0.47 (0.34-0.64) | 3.75E-06 | 0.06                    | 0.03 | 0.12 | <i>SLC39A8</i> (195k); <b><i>NFKB1</i></b> (intron 5); <i>MANBA</i> (91k)                  |
| 22  | 27826429  | *      | rs60163793 | G             | 2.01 (1.20-3.38) | 4.30E-06 | 0.04                    | 0.14 | 0.15 | <i>MN1</i> (318k), <i>PITPNB</i> (421k)                                                    |
| 12  | 19824386  |        | rs7313907  | C             | 0.66 (0.55-0.79) | 4.35E-06 | 0.33                    | 0.37 | 0.16 | <i>AEBP2</i> (149k), <i>PLEKHA5</i> (295k)                                                 |
| 12  | 19820677  |        | rs11044754 | A             | 0.66 (0.55-0.79) | 4.54E-06 | 0.33                    | 0.37 | 0.16 | <i>AEBP2</i> (146k), <i>PLEKHA5</i> (291k)                                                 |
| 15  | 101233236 |        | rs55638658 | A             | 1.61 (1.13-2.30) | 5.08E-06 | 0.18                    | 0.15 | 0.18 | <i>ASB7</i> (41k), <i>LINS1</i> (91k), <i>PRKXP1</i> (134k)                                |
| 6   | 54581204  | *      | rs13200833 | A             | 0.66 (0.48-0.90) | 5.15E-06 | 0.32                    | 0.24 | 0.22 | <i>TINAG</i> (326k), <i>MLIP</i> (450k); <i>FAM83B</i> (130k)                              |

**LD SNP:** An asterisk indicates SNPs that are not in linkage disequilibrium (not in LD defined as  $R^2 < 0.8$  in any population) with other SNPs that have more significant association  $p$ -values; **Nearest genes:** Distance to the nearest RefSeq genes are indicated in parentheses. Genes that overlap with BDR-associated SNPs are bold. High drug responders were assigned as cases in analyses throughout this study.



Table 5. Results from association testing on combined effects of rare variants on BDR

| Chr | Start     | Stop      | <i>p</i> | Population | Nearest genes                                                                               |
|-----|-----------|-----------|----------|------------|---------------------------------------------------------------------------------------------|
| 1   | 114177000 | 114178000 | 4.40E-09 | MX         | <b>MAGI3 (intron 9)</b> , <i>PHTF1</i> (62k), <i>RSBN1</i> (126k)                           |
| 11  | 27507000  | 27508000  | 6.59E-09 | MX         | <i>LOC105376671</i> (3k), <i>LGR4</i> (13k), <i>LIN7C</i> (8k)                              |
| 19  | 10424000  | 10425000  | 3.12E-11 | AA         | <i>ZGLP1</i> (4k), <i>ICAM5</i> (17k), <b>FDX1L (intron 3)</b> , <i>RAVER1</i> (2k)         |
| 4   | 73478000  | 73479000  | 6.25E-08 | Combined   | <i>ADAMTS3</i> (43k), <i>COX18</i> (441k)                                                   |
| 8   | 97926000  | 97927000  | 1.32E-08 | Combined   | <i>SDC2</i> (302k), <b>CPQ (intron 4)</b> , <i>LOC101927066</i> (37k), <i>TSPYL5</i> (359k) |

chr: chromosome; AA: African Americans; MX: Mexicans; Combined: all individuals in all three populations. Nearest genes: Distance to the nearest RefSeq genes is indicated in parentheses. Genes that overlap with BDR-associated SNPs are bold.
